# **Novel Strategies for Glutamate Clearance in the Glia-Deprived Synaptic Hub of *C. elegans***

*Abbreviated Title: Glutamate Clearance in Nematode Glia-Deprived Synapses*

Joyce Chan<sup>1,2,#</sup>, Kirsten KyungHwa Lee<sup>1,#</sup>, Jenny Chan Ying Wong<sup>1,3</sup>, Paola Morocho<sup>4</sup>, and Itzhak Mano<sup>1,2\*</sup>.

1) Cellular, Molecular, and Biomedical Science, CUNY School of Medicine, City College of New York (CCNY), The City University of New York (CUNY).

2) PhD Program in Biology, The CUNY Graduate Center

3) M.A. Program in Biology, CCNY.

4) Undergraduate Program in Biology, CCNY.

# These authors contributed equally.

\* Corresponding author:

Dr. Itzhak Mano

Cellular, Molecular, and Biomedical Science, CUNY School of Medicine, City College of New York (CCNY), The City University of New York (CUNY).

Center for Discovery & Innovation (CDI), Room 3-382

85 St. Nicholas Terrace, New York, NY 10031

E-mail: [imano@ccny.cuny.edu](mailto:imano@ccny.cuny.edu) Phone: 212-650-7965

X pages, Y figures, Z supplementary figures.

Word count: Abstract: 249 Introduction: 649 Discussion: 1233

Conflict of Interest: The authors declare no competing financial interests.

This project was initiated with funding from the American Heart Association (0635367N), and later supported by the National Science Foundation (IOS-1022281) and NINDS (NS 098350) to IM. We express tremendous thanks to M. Katz, S. Shaham, C. Bargmann, and S. Chalasani for their extensive guidance in setting up and running the microfluidics system. We thank C. Bargmann, M. Alkema, and D. Biron for gift of *C. elegans* GCaMP strains, and D. Hall & S. Emmons for guidance on worm connectivity. We thank all members of the Mano, Li, and Emerson labs for continuous support.

## 28 **Abstract**

29 Brain function requires the ability to form neuronal circuits that mediate focused and accurate  
30 communication. Since the vast majority of brain synapses use Glutamate (Glu) as their  
31 neurotransmitter, unintended spillover of Glu between adjacent synapses is a critical challenge. To  
32 ensure accurate neurotransmission and avert synaptic mix-up, specialized Glu Transporters (GluTs)  
33 clear the synapse of released Glu. While classical views of neuronal morphology and physiology  
34 depict isolated spiny synapses enwrapped by GluT-expressing glia, in reality, a considerable portion  
35 of synapses are flat, glial coverage in some parts of the brain is rather sparse, and extracellular space  
36 is larger than previously estimated. This suggests that diffusion in interstitial fluids might have an  
37 important role in Glu clearance in these synapses. To understand basic principles of Glu clearance in  
38 flat-, glia-deprived synapses, we study the physiology of neuronal circuits in the *C. elegans* nerve  
39 ring, the nematode's aspiny synaptic hub. We use behavioral assays, Ca<sup>2+</sup> imaging, and iGluSnFR to  
40 follow synaptic activity in intact animals. We find that synapses in a nociceptive avoidance circuit are  
41 dramatically affected by distal GluTs, while an adjacent chemoattraction circuit is controlled by  
42 proximal GluTs. We also find that pharyngeal pulsatility and mobility, which could agitate interstitial  
43 fluids, are critical for synaptic physiology. We therefore conclude that robust Glu clearance in the  
44 nematode is provided differentially by distal and proximal GluTs, aided by agitation of interstitial fluids.  
45 Such principles might be informative in determining additional factors that contribute to robust Glu  
46 clearance in other neuronal systems.

48 **Significance Statement**

49 The nervous system depends on faithful relay of information without inadvertent mixing of signals  
50 between neuronal circuits. Classical views of the nervous system depict isolated synapses,  
51 enwrapped by glia that express neurotransmitter-transporters. However, this view is incomplete, since  
52 many synapses are flat, deprived of glia, and exposed to a larger-than-expected extracellular space.  
53 We use optogenetic tools to investigate glutamate clearance strategies in the aspiny and glia-  
54 deprived synaptic hub of intact nematodes. We find a division of labor among Glutamate transporters:  
55 while some transporters display classical localization near the synapses, others are distal, and  
56 cooperate with agitation of interstitial fluids to prevent glutamate accumulation. These novel principles  
57 might contribute to synaptic clearance in higher animals, affecting normal neuronal physiology and  
58 disease.

59

## 60 **Introduction**

61 Normal physiology of the nervous system depends on channeling signals into well-defined neuronal  
62 circuits, without inadvertent interruptions from neighboring circuits. This is especially difficult because  
63 80-90% of the synapses in the mammalian brain use the same neurotransmitter, Glutamate (Glu)  
64 (Brady et al., 2012). To maintain circuit resolution and accuracy, synaptically released Glu is removed  
65 by secondary-active Glu Transporters (GluTs) (Danbolt, 2001; Tzingounis and Wadiche, 2007;  
66 Vandenberg and Ryan, 2013). While a moderate decline in GluT function blurs synaptic pulses,  
67 pronounced malfunction causes toxic accumulation of synaptic Glu, leading to neurodegeneration by  
68 excitotoxicity (seen in brain ischemia and a range of neurodegenerative diseases (Danbolt, 2001)).  
69 Robust clearance by GluTs is therefore necessary for accurate rapid signaling, curtailing spillover,  
70 and preventing excitotoxicity. Several subtypes of GluTs are found in the brain, exhibiting a range of  
71 cellular and regional expression patterns, and important differences in physiological properties.  
72 However, the functional significance of these differences remains unclear.

73  
74 When considering clearance physiology, it is interesting to highlight recent insights into synaptic  
75 architecture. Classical views of synaptic organization include a presynaptic bouton, a postsynaptic  
76 spine, and GluT-expressing glia that envelope and insulate the synapse (Harris, 1999; Petralia et al.,  
77 2016). Such organization is optimal for preventing Glu spillover, while the structure of the spine is  
78 highly beneficial for creating a chemical and electrical subcellular domain (Hausser et al., 2000;  
79 Yuste, 2013). However, in critical areas of the brain, only a 1/3 of synapses are associated with glia  
80 (Ventura and Harris, 1999; Ostroff et al., 2014; Sudhof, 2018) and Glu spillover is prominent  
81 (Kullmann and Asztely, 1998). Furthermore, some synapses, especially in the developing brain, are  
82 flat shaft synapses (Segal, 2010) that have distinctive functional features, allowing for more direct  
83 passive cable conductance of depolarization (Rall, 1959; Magee, 2000). Flat shaft synapses show  
84 scant GluTs (Chaudhry et al., 1995), relying more on diffusion as the primary mode of Glu clearance

85 (Barbour et al., 1994; Clements, 1996; Thomas et al., 2011). Furthermore, recent studies suggest that  
86 the fraction of extracellular space in the intact brain is much higher than previously suggested,  
87 particularly around synaptic connections (Korogod et al., 2015; Tonnesen et al., 2018). Additional  
88 studies emphasize the significance of the brain's glymphatic system and its ability to clear  
89 macromolecules by bulk flow (Tarasoff-Conway et al., 2015; Da Mesquita et al., 2018; Rasmussen et  
90 al., 2018). Functional models suggest that an open synaptic architecture is conducive to clearance by  
91 diffusion and bulk flow (Nicholson and Hrabetova, 2017). Nonetheless, clearance of Glu in aspiny,  
92 glia-deprived synaptic hubs exposed to high-fraction extracellular space and interstitial fluids remains  
93 understudied. How circuit coherence is maintained in the absence of anatomical synapse isolation  
94 remains poorly understood.

95  
96 To address this gap in our knowledge, we turn to the model system of the transparent nematode *C.*  
97 *elegans*, which combines powerful genetic, molecular, and intact-animal optogenetic tools, with an  
98 extraordinarily detailed description of the nervous system (White et al., 1986). In the nematode nerve  
99 ring (its hub of synaptic activity), aspiny neurons encircle the animal's pharynx and form multiple *en*  
100 *passant* synapses between neurites. Communication relies mostly on passive cable propagation  
101 (Goodman et al., 1998). Four cephalic sheath glia cells wrap around the circumference of the nerve  
102 ring (Altun et al., 2002-2019) and (for the most part, with some exceptions (Singhvi and Shaham,  
103 2019)) do not provide separation between synapses, or separate interstitial fluids in the neuropil from  
104 the body fluids of the pseudocoelom. Since Glu is a key excitatory neurotransmitter in *C. elegans*  
105 (Brockie and Maricq, 2006), the nematode maintains a fully functional Glu signaling system and high  
106 fidelity circuit resolution under an unfavorable nervous system configuration, one that lacks  
107 anatomical separation and utilizes the same neurotransmitter in many adjacent synapses. In our  
108 studies we ask if these challenges are addressed in *C. elegans* by a compensatory, especially robust  
109 function of the Glu clearance system to maintain the accuracy of Glu signaling and circuit resolution.

## 111 **Materials and methods**

### 112 Strains and maintenance

113 All *Caenorhabditis elegans* strains were cultured at 20°C on MYOB plates (Brenner, 1974; Church et  
114 al., 1995) with *Escherichia coli* strain OP50 as food source. Our wild type strain is Bristol N2. Other  
115 strains used for this study are: For behavioral analysis: VM1268: *nmr-1(ak4) II*; *glr-2(ak10)*, *glr-*  
116 *1(ky176) III* ; ZB1113: *glt-1(ok206) X* ; ZB1096: *glt-3(bz34) IV* ; ZB1098: *glt-4(bz69) X* ; IMN16: *glt-*  
117 *3(bz34)*, *glt-6(tm1316)*, *glt-7(tm1641) IV* ; For GCaMP imaging in AVA: QW625 (*lin-15*; *zfls42[P<sub>rig-</sub>*  
118 *3::GCaMP3::SL2::mCherry*; *lin-15(+)*]); IMN18: *glt-1(ok206) X*; *zfls42* ; IMN19: *glt-3(bz34)*, *glt-*  
119 *6(tm1316)*, *glt-7(tm1641) IV*; *zfls42* ; IMN20: *glt-4(bz69) X*, *zfls42* ; For GCaMP imaging in ASH:  
120 CX10979 (*kyEx2865[P<sub>sra-6</sub>::GCaMP3*; *ofm-1::gfp*] ) ; For iGluSnFR imaging around AVA's nerve ring  
121 neurites: CX14652: *kyEx4787 [P<sub>rig-3</sub>::iGluSnFR*, *unc-122::dsRed*] ; IMN50: *glt-1(ok206) X*; *kyEx4787*;  
122 IMN51: *glt-3(bz34)*, *glt-6 (tm1316)*, *glt-7 (tm1641) IV* ; *kyEx4787*. Details of the *glt* mutant strains  
123 were previously described (Mano et al., 2007). The strains carrying *glt* mutations and AVA neurons  
124 expressing GCaMP or iGluSnFR (IMN18, IMN19, IMN20, IMN50 and IMN51) were generated by  
125 crosses between the corresponding *glt* mutants and the QW625 or CX14652 strain. QW625 (Shipley  
126 et al., 2014) was a gift from the Alkema lab (U. Mass. Med. Sch.) and was obtained via the Biron lab  
127 (U. Chicago) (Iwanir et al., 2013). The CX10979 (Larsch et al., 2013) and CX14652 (Marvin et al.,  
128 2013) strains were gifts from the Bargmann lab (Rockefeller U.).

129

### 130 Behavioral assays

131 Spontaneous mobility assay (Zheng et al., 1999; Brockie et al., 2001a; Mellem et al., 2002) and nose  
132 touch assay (Kaplan and Horvitz, 1993; Hart et al., 1995) were conducted as previously described.  
133 For the spontaneous mobility assay, the forward locomotion duration was determined until the  
134 individual worm either halts movement or reverses. For nose touch response we determined the

135 number of worms responding (halting or reversing) or not responding (continuing forward mobility) to  
136 collision with an eyelash. For each session, about 30 animals of each genotype were tested.

137 Avoidance drop assay was conducted for testing worms' avoidance response to a range of NaCl  
138 concentrations as previously described (Chatzigeorgiou et al., 2013). We tested NaCl concentrations,  
139 ranging from 0.1 mM to 1000 mM, dissolved in 1mM MgSO<sub>4</sub>, 1 mM CaCl<sub>2</sub>, and 5 mM KPO<sub>4</sub>. For  
140 each session, worms were transferred to an unseeded MYOB plate and left there for 15 min to  
141 remove remaining food on their body. Worms were then transferred to the assay plate and were given  
142 an additional 15 min to adjust to the buffer solution. A capillary tube was used to make a drop near  
143 the tail of a forward-moving worm. The drop immediately surrounds the whole worm body. A mere  
144 mechanosensory stimulation to the tail will stimulate the worm to rush forward, but chemorepellent  
145 properties of solutes sensed in the nose will cause the worm to halt or reverse. The worms' response  
146 within 4 s after the drop was denoted as 0 if the worms continued their forward movement, and as 1 if  
147 worms either stopped or reversed. To present the trend of avoidance over a range of NaCl  
148 concentrations, we used avoidance index equal to the percentage of worms avoiding specific NaCl  
149 concentration.

150

## 151 Microfluidics and imaging

152 Prior to imaging, adult worms were first transferred onto non-seeded MYOB holding plate. Worms  
153 were allowed to traverse the holding plate for 10 minutes, removing excess bacteria adhering to their  
154 bodies. For stimulation experiments with glycerol, S-basal buffer was added onto the holding plates  
155 for no more than 10 minutes before positioning of each individual worm into the worm channel of the  
156 microfluidics chip. For the salt stimulation experiments, a solution consisting of 1 mM MgSO<sub>4</sub>, 1 mM  
157 CaCl<sub>2</sub>, and 5 mM KPO<sub>4</sub> (salt stimulation buffer) was used instead (Oda et al., 2011).

158 The Chronis & Bargmann worm behavioral chip (Purchased from MicroKosmos) was used for  
159 GCaMP and iGluSnFR imaging experiments (Chronis et al., 2007). This system allows for temporal

160 stimulation of amphid sensory neurons located on the worm nose. Worms were physically restrained  
161 in a specially fitted channel (the worm trap) designed to hold adults without the use of paralytic agents  
162 that may interfere with normal physiology. A system of liquid streams controlled under laminar flow  
163 were manipulated to present either control buffer or stimulus to the worm nose (Chronis et al., 2007)  
164 via a three-way electric valve (Lee Company). GCaMP and iGluSnFR transients from live nematodes  
165 trapped in the chip were recorded as previously described by Chronis & Bargmann. To generate the  
166 stimulant solutions, glycerol was dissolved in S Basal buffer to a final concentration of 1 M (Chronis  
167 et al., 2007), while 1 mM NaCl was dissolved in salt stimulation buffer. For paralysis experiments,  
168 either 2 mM tetramisole (Sigma) or 0.3 M BDM (2,3-Butanedione monoxime) (VWR) dissolved in  
169 either S-basal or salt stimulation buffer was introduced via the buffer channel of the microfluidics  
170 system to paralyze the anterior portion of the worm. Paralysis was induced by exposing the head of  
171 the immobilized animals contained in the worm trap of the microfluidics chamber to the paralytic  
172 agents for no more than 10 minutes.

173 Our imaging system consists of a Zeiss Axiovert 200 M motorized inverted microscope, Lumencor  
174 SOLA solid state white light source, Ludl filter wheel controller, Q Imaging EXi™ Blue camera, and  
175 ValveBank4 controller (AutoMate). Metamorph software (Molecular Devices) was used for image  
176 processing and acquisition. GCaMP transients were captured with a 63x objective lens (10 frames/s),  
177 while iGluSnFR transients were captured at 40x magnification (3 frames/s) for each experiment  
178 duration.

179 We used  $\Delta F/F$  to indicate change in fluorescence intensity. F was defined as the baseline  
180 fluorescence intensity of AVA during a period of either 3 seconds (for recording effects of salt  
181 stimulation in AVA GCaMP and the iGluSnFR experiments) or 4 seconds (for recording AVA GCaMP  
182 signals during response to glycerol). Intensity measurements were restricted to AVA cell body for  
183 GCaMP imaging, and neuronal processes for iGluSnFR imaging. This was achieved by first setting  
184 an inclusive intensity threshold to define the range of fluorescence to capture (i.e., neuronal soma or



185 process, which has higher intensity compared to other cells and structures), then defining a region of  
186 interest (ROI) to capture from. To restrict iGluSnFR measurements to AVA neuronal processes in the  
187 absence of animal paralysis, the ROI was manually shifted to follow the location of the neurite, and  
188 fluorescence was logged manually. Reporter transients were analyzed by comparing subsequent  
189 intensity readouts to the baseline intensity, expressed as a change in percentage.

190

## 191 Statistical analysis

192 All statistical analyses was performed utilizing GraphPad Prism software. For the nose touch and the  
193 drop test assays, we used the Student's t-test with Welch's correction to compare significance of  
194 differences between mutant and N2 control strains. For GCaMP and iGluSnFR data, ANOVA with  
195 post hoc Bonferroni test was used for multiple group comparison of their means. Error bars denote  
196 SEM, and statistical significance is noted with \* based on P values.

197

198

## 199 **Results**

200

201 *Behaviors mediated by the avoidance circuit are strongly sensitive to manipulation of distal, but not*  
202 *proximal, GluTs.*

203 Our previous studies of Glu clearance in *C. elegans* suggested an unusual functional organization of  
204 Glu uptake, emphasizing the role of distal clearance (Mano et al., 2007). GFP-promoter fusion  
205 experiments reveal the expression of two GluT genes close to the nerve ring: *glt-1* is expressed in  
206 head muscles and in the hypodermis (Katz & Shaham later show glial expression of *glt-1* (Katz et al.,  
207 2018)), while *glt-4* is expressed in some head neurons. The three remaining highly expressed GluT  
208 genes (*glt-3*, *glt-6*, & *glt-7*) are expressed distally from the synapses, solely on the canal cell (an H-  
209 shaped tubular cell running along the length of the animal). This structure passes the nerve ring  
210 latero-ventrally, maintaining a distance of ~10 microns from most glutamatergic synapses. We  
211 therefore classified *glt-1* & *glt-4* as proximal GluTs, and *glt-3*, *glt-6*, & *glt-7* as distal GluTs. Amino acid  
212 sequences at the GluT active site (conserved across phyla and in nematode proximal GluTs) suggest  
213 that the nematodes' distal GluTs may have unusual physiological properties. Despite these unusual  
214 characteristics of distal GluTs, our genetic studies have shown that these GluTs have a critical effect  
215 on Glu synapses under both normal (Mano et al., 2007) and pathological conditions (Mano and  
216 Driscoll, 2009; Mojsilovic-Petrovic et al., 2009; Tehrani et al., 2014; Del Rosario et al., 2015).

217

218 We now examine the functional role of these distal GluTs in more detail. We produced a combined  
219 knockout of all distal GluTs (*glt-3*, *glt-6*, & *glt-7*) but were unable to produce a combined KO of  
220 proximal GluTs (*glt-1*; *glt-4*), potentially because of a vital role in early development. We find that KO  
221 of all distal (but not proximal) GluTs shortens the duration of spontaneous forward mobility and

222 disrupts nose touch response (Figure 1). Both behaviors are known to be mediated by a bilateral pair  
223 of glutamatergic polymodal nociceptive sensory neurons ASH (L/R), and their main GluR-expressing  
224 postsynaptic target neurons AVA, AVD, & AVE (which mediate animal reversal, and are therefore  
225 denoted as the nociceptive or avoidance circuit; minor additional/indirect contributions come from  
226 additional neurons) (Mellem et al., 2002; Brockie and Maricq, 2006). The balance between forward  
227 and backward runs in spontaneous mobility (quantified as either the duration of forward runs before  
228 halting, or the frequency of reversals) and sensitivity to nose touch (quantified as the fraction of  
229 animals responding to a collision with an obstacle) are considered to be very sensitive measures of  
230 glutamatergic activity in these synapses (Zheng et al., 1999; Burbea et al., 2002; Chang and Rongo,  
231 2005; Brockie and Maricq, 2006). The behavioral effect of combined distal GluT KO is in line with our  
232 previous analyses of *glt-3* (a single KO strain), and the ability of that mutation to compensate for  
233 other mutations (such as *eat-4* and *glr-1*) that reduce Glu signaling in the avoidance circuit (Mano et  
234 al., 2007). Therefore, our observations on behaviors of distal GluT mutants (but not proximal GluT)  
235 mutants in response to spontaneous mobility and nose touch are consistent with a model where *glt-3*,  
236 *glt-6*, & *glt-7* KO caused an accumulation of Glu in the ASH -> AVA/AVD/AVE synapses.

237  
238 *GCaMP- and iGluSnFR- based imaging of neuronal activity in AVA provide direct evidence for hyper*  
239 *stimulation of the avoidance circuit in distal GluT KO animals.*

240 To examine the effect of GluT KO on physiological responses of the postsynaptic neurons in the  
241 avoidance circuit more directly, we set up a nematode microfluidics and imaging system similar to the  
242 setup pioneered by the Bargmann lab (Chalasanani et al., 2007; Chronis et al., 2007; Chalasanani et al.,  
243 2010; Chronis, 2010). In this setup, the worm is restrained in a microfluidic chip in absence of  
244 paralytic agents, restricting exposure of stimulant solutions to the nose (and consequently, sensory  
245 amphid neuron endings). The nematode's transparency allows for non-invasive, *in vivo* recording of  
246 physiological neuronal activity, which we monitor using genetically encoded fluorescent Ca<sup>2+</sup> sensor

247 (GCaMP) expressed in identified neurons. In summary, this system provides us an easily accessible  
248 window into neuronal activity in specific postsynaptic neurons in intact animals without compromising  
249 the hydrodynamics of interstitial fluids or changes in concentrations of our neurotransmitter of  
250 interest. We used GCaMP expressed in AVA (the main mediator of avoidance responses) to monitor  
251 the activity of this neuron in response to ASH stimulation by high concentration glycerol (Figure 2,  
252 measuring changes in whole-soma GCaMP fluorescence, which is correlated with membrane  
253 depolarization in this cell (Piggott et al., 2011)). We used the QW625 (*zfls42[P<sub>rig-3</sub>::GCaMP3::SL2::mCherry]*) strain (Shipley et al., 2014) due to its inter-animal consistency (as a  
254 strain containing a genetically integrated reporter) in GCaMP intensity. Though ASH-specific  
255 nociceptive stimuli are known to produce measurable GCaMP responses in AVA in freely moving  
256 animals (Chronis et al., 2007; Piggott et al., 2011; Cho and Sternberg, 2014), the consistency of this  
257 response is reduced in animals restrained in the microfluidic chip (in line with observations made by  
258 other labs on AVA responses in restrained vs free animals, S. Chalasani, personal communication). A  
259 small AVA response is observed when the proximal GluTs *glt-1* or *glt-4* are eliminated. In sharp  
260 contrast, elimination of the distal GluTs *glt-3*, *glt-6*, & *glt-7* elicited a very prominent response to  
261 glycerol (Figure 2).  
262

263  
264 Next, we sought to determine if the increased responses in AVA in distal GluT KO animals arose  
265 directly from increased concentration of perisynaptic Glu around AVA's neurites, and not from  
266 heightened response sensitivity of AVA, or from gap junctions from other neurons affecting AVA. To  
267 directly track effects on perisynaptic Glu concentrations we used the Glu-sensitive extracellular  
268 sensor iGluSnFR, expressed specifically in AVA neurons in CX14652 (*kyEx4787 [P<sub>rig-3</sub>::iGluSnFR,*  
269 *unc-122::dsRed]*) animals (Marvin et al., 2013), and measured changes in fluorescence on AVA's ring  
270 neurites. Measuring changes in iGluSnFR fluorescence in AVA neurites in the nerve ring is  
271 technically challenging, especially when the animal continues to perform pharyngeal pumping and  
272 local pharynx movements in the absence of pharmacological paralyzing agents. Nonetheless, in

273 response to ASH stimulation we saw a small increase in Glu readouts in AVA's nerve ring neurites in  
274 *glt-1* mutant and a dramatic increase in *glt-3* mutants (Figure 3).

275

276 The GCaMP and iGluSnFR –based imaging data correlate with the behavioral observations, and  
277 provides direct evidence (at the level of perisynaptic Glu concentrations and postsynaptic response  
278 physiology) that elimination of distal Glu clearance strongly potentiates Glu signaling between ASH  
279 and AVA in the avoidance circuit, while elimination of proximal GluTs produces only a small  
280 potentiation of AVA responses. Altogether, these observations support that, unlike proximal GluTs,  
281 distal GluTs have a major role in clearing Glu from ASH -> AVA synapses. Given the challenges in  
282 measuring changes in perisynaptic Glu concentrations with iGluSnFR in non-paralyzed animals, we  
283 proceeded to further analysis mostly by using GCaMP imaging to detect changes in intracellular  $Ca^{2+}$   
284 concentrations in the soma as a reasonable reporter of synaptic excitation. As we start gaining insight  
285 into the preferential contribution of distal vs proximal GluT to Glu clearance in the avoidance circuit,  
286 we became interested to compare it to the contribution of different GluTs to the activity of other  
287 circuits, such as a circuit that normally mediates chemoattraction.

288

289 *Reduction of proximal Glu clearance generates avoidance response to low concentration of NaCl.*

290 We next assessed the effect of GluT KO on the nematode's response to NaCl, since NaCl affects a  
291 pair of functionally well-separated but anatomically adjacent neuronal circuits. The response to NaCl  
292 is mediated in the nematode mostly by two pairs of sensory neurons, depending on concentration  
293 (Bargmann and Horvitz, 1991; Hukema et al., 2006; Suzuki et al., 2008; Oda et al., 2011;  
294 Chatzigeorgiou et al., 2013; Kunitomo et al., 2013; Leinwand and Chalasani, 2013). Low NaCl  
295 concentrations (< 200 mM) are chemoattractive: the bilateral ASE sensory neurons are sensitive to  
296 low NaCl concentrations and use Glu to signal forward mobility by regulating AIB, AIA, and AIY  
297 interneurons. Combined with alternating head movements, ASEL detects an increase in salt

298 concentration, inhibiting AIBs through Glu-gated Cl<sup>-</sup> channels such as GLC-3 to suppress reversal.  
299 ASER detects a concentration decrease, stimulating the AIBs through AMPA-Rs (such as GLR-1)  
300 and metabotropic GluRs, causing animal reversal (Suzuki et al., 2008; Wang et al., 2017; Kuramochi  
301 and Doi, 2018). In contrast to the sensitivity of ASEs to low salt concentrations, high NaCl  
302 concentrations are nociceptive and generate avoidance responses, stimulating the ASH neurons and  
303 their associated avoidance circuit (Chatzigeorgiou et al., 2013). Since the synapses of avoidance and  
304 chemoattractive circuits are localized with considerable anatomical proximity in the nerve ring (see  
305 below), we sought to determine whether GluTs contribute to the maintenance of these circuits'  
306 functional separation, and if GluT KO might cause Glu spillover between these circuits. As a first  
307 attempt to find evidence that such a spillover occurs, we tested the possibility that low NaCl  
308 concentrations (which normally stimulate the ASE->AIA/AIB/AIY chemoattractive circuit) might trans-  
309 activate the ASH->AVA/AVD/AVE circuit and produce avoidance when GluTs are absent. We  
310 therefore measured the concentration dependence of avoidance response to NaCl using the drop  
311 assay (Suzuki et al., 2008; Chatzigeorgiou et al., 2013). We found that mutations in *glt-1* or *glt-4* (the  
312 two proximal GluTs), but not *glt-3*, *glt-6*, & *glt-7* KO (the distal GluTs) dramatically changed the  
313 normal behavioral dose-response curve of NaCl: an extremely low NaCl concentration (1mM), which  
314 is normally attractive, is chemorepulsive in proximal GluT mutants (Figure 4). This result suggests  
315 that Glu from the ASE -> AIA/AIB/AIY circuit might have spilled over to the ASH -> AVA/AVD/AVE  
316 circuit.

317

318 While spillover of Glu between these two circuits is one possible explanation for our observations, a  
319 battery of other explanations could be offered. One alternative explanation is that indirect signaling  
320 between the two circuits through other neuronal connections. However, the contribution of indirect  
321 inputs to AVA from neurons such as AIB is considered relatively minor (see WormWeb.org). Another  
322 possibility is that the ASH neurons are in fact sensitive to low NaCl concentration and release weak  
323 Glu signals onto AVA that can be potentiated by GluT KO. To negate the latter possibility, we directly

324 monitored the activation of ASH by measuring its  $\text{Ca}^{2+}$  responses to different concentrations of NaCl,  
325 using the CX6632 *kyEX728 [P<sub>sra-6</sub>::GCaMP]* strain (Chronis et al., 2007). In accordance with other  
326 reports (Leinwand and Chalasani, 2013), we find that ASH responds only to very high NaCl  
327 concentrations (Supplementary Figure 1). Altogether, these observations further suggest that the  
328 avoidance response to 1mM NaCl in proximal GluT KOs is not due to potentiation of previously weak  
329 presynaptic release from ASH neurons (that, until recently, went undetected by postsynaptic  
330 measurement), and is therefore more likely to represent Glu spillover from other sensory neurons.

331

332 *Reduction of proximal Glu clearance causes abnormal AVA activation in response to low NaCl*  
333 *concentration.*

334 The glutamatergic sensory ASE neuron was previously shown to be responsible for responses to low  
335 NaCl concentrations by triggering activity in the ASE -> AIA/AIB/AIY chemoattractive circuit. The ASE  
336 -> AIA/AIB/AIY circuit is therefore the leading candidate to be the source of Glu in the abnormal  
337 avoidance responses we observe in proximal GluT KO animals under stimulation with low NaCl  
338 concentrations. We then progressed from the behavioral to the physiological level, recording  $\text{Ca}^{2+}$   
339 responses to low NaCl concentrations in AVA neurons in GluT KO animals. We find that AVA's neural  
340 activity correlates with the avoidance responses in the NaCl drop assay (Figure 5): while low NaCl  
341 concentrations do not elicit an AVA response in either WT or distal GluT (*glt-3*, *glt-6*, & *glt-7*) KO  
342 background, reducing proximal Glu clearance by either *glt-1* KO or *glt-4* KO results in a robust AVA  
343  $\text{Ca}^{2+}$  response to stimulation of animals by low NaCl. Again, we verified that the somatic  $\text{Ca}^{2+}$   
344 responses from GCaMP recordings are correlated with perisynaptic increases in Glu levels, as  
345 recorded with iGluSnFR in AVA neurites (Supplementary Figure 2). These observations suggest that  
346 in the absence of proximal GluTs, Glu released by circuits sensitive to low NaCl concentrations now  
347 reach AVA. The most direct explanation that suffices to account for these observations is that in the  
348 absence of proximal GluTs, Glu released from ASE (in response to animal stimulation with low NaCl



349 concentration) escapes the ASE -> AIA/AIB/AIY circuit and spills over to the ASH -> AVA/AVD/AVE  
350 circuit (though we do not exclude the alternative possibility of potentiation of inputs to AVA from other,  
351 indirect connections). According to this view, Glu spilled over from ASE-AIA/AIB/AIY synapses (or, in  
352 the alternative model, Glu coming from irregularly potentiated indirect connections) now generates an  
353 abnormal avoidance response to a normally chemoattractive stimulant. These observations also  
354 suggest that in the WT, proximal GluTs are positioned to have a privileged effect on Glu released by  
355 ASE and prevent its spillover beyond its designated postsynaptic targets, while distal GluT  
356 preferentially clears Glu released from ASH. Therefore, different GluTs exhibit specialized or  
357 privileged functional roles in different synapses.

358

359 *Differential localization of ASH and ASE synapses in the nerve ring might contribute to the differential*  
360 *effect of proximal and distal Glu clearance.*

361 Intrigued by the privileged role of different GluTs in different circuits, we looked into existing  
362 anatomical data on the location of synapses in the ASE -> AIA/AIB/AIY chemoattraction circuit and  
363 the ASH -> AVA/AVD/AVE avoidance circuit. The nematode connectome was established by utilizing  
364 EM images of coronal sections (presented as consecutively-numbered slices) and reconstruction data  
365 (initially published as “The Mind of the Worm”) (White et al., 1986). This data was later developed by  
366 the Hall and Emmons labs in the form of the comprehensive web resources available at  
367 WormAtlas.org, WormWiring.org, and CytoShow.org (Altun et al., 2002-2019; Jarrell et al., 2012). The  
368 data is now available as a collection of fully annotated consecutive slices and as a complete record of  
369 the location and identity of the synapses, as well as 3D reconstruction of all neurons (Brittin et al.,  
370 2018). We used these web resources to locate the synapses relevant to our study. We find that the  
371 neuronal processes of the two circuits we study are indeed adjacent, as they track rather closely in  
372 the nerve ring. Furthermore, the ASE -> AIA/AIB/AIY and ASH -> AVA/AVD/AVE synapses, as  
373 identified in the Worm Connectome project, are frequently found in close proximity to each other.



374 Figure 6 shows a detail from slice #87 of the EM series, where ASE -> AIB/AIY synapses (cell  
375 processes labeled with red outline) and ASH -> AVD synapses (cell processes labeled with blue  
376 outline) are found in close proximity, with the synapse of the latter gradually expanding to add AVA to  
377 the left of AVD (fully visible in slice #91). Overall, the synapses of the two circuits are positioned  
378 favorably enough for Glu spillover to occur.

379

380 To expand our study beyond slice #87 (Figure 6), we scanned further through a considerable number  
381 of slices where these synapses are found (in the range of slices #~80-130), using WormWiring.org  
382 and CytoShow.org. Supplementary figure 3 presents further annotation of slices # 79, 84, 94, and 99  
383 as an example. We find that the ASE -> AIA/AIB/AIY synapses are consistently found closer to (and  
384 seem to have synaptic vesicles released toward) the outer rim of the nerve ring (closer to the muscle  
385 and surrounding hypodermis). In contrast, the ASH -> AVA/AVD/AVE synapses are found closer to  
386 (and seem to release synaptic vesicles toward) the inner rim of the nerve ring (closer to the pharynx).  
387 In our previous studies (Mano et al., 2007), the expression of *glt-4* was assigned to neurons, but  
388 neuronal identities were difficult to ascertain, obscuring the basis for its privileged role. In contrast,  
389 both partial (Mano et al., 2007) and full-length protein fusion (data not shown) of GLT-1::GFP indicate  
390 that *glt-1* is heavily expressed in head muscles and in hypodermis, while Katz & Shaham show that it  
391 is also expressed in cephalic sheath glia (Katz et al., 2018) that wraps around the outer  
392 circumference of the nerve ring. The juxtaposition of the ASE -> AIA/AIB/AIY synapses and the *glt-1*  
393 (proximal GluT) -expressing head muscles, hypodermis, and glia could therefore provide a basis for  
394 the privileged role of *glt-1* in clearing Glu released from ASE, and explain the susceptibility of *glt-1* KO  
395 animals to the putative spillover of Glu out of ASE -> AIA/AIB/AIY synapses (as evidenced by AVA  
396 stimulation by low NaCl concentrations in these animals, Figures 4 & 5).

397

398 *Motility of the head and pharynx is critical to preserve the fidelity of AVA synaptic activity.*

399 Although the privileged role of the proximal *glt-1* on ASE -> AIA/AIB/AIY synapses can now be  
400 reasonably explained by the proximity of these synapses to the head muscles, hypodermis, and glia,  
401 it remains unclear how the distal GluTs (*glt-3*, *glt-6*, & *glt-7*), expressed on the canal cell, might  
402 preferentially affect the ASH -> AVA/AVD/AVE synapses, which are closer to the pharynx. Since the  
403 canal cell is directly exposed to pseudocoelomic body fluids, distal GluTs are likely regulate ambient  
404 Glu levels in body fluids. Ambient extracellular Glu concentrations in the vicinity of mammalian  
405 synapses are known to affect synaptic Glu clearance by diffusion (Kullmann and Asztely, 1998;  
406 Bergles et al., 1999; Diamond, 2002). Interestingly, in the worm, nerve ring interstitial fluids are  
407 continuous with the pseudocoelomic fluid found in the space between the nerve ring and the isthmus  
408 of the pharynx (marked as blue shaded arch in Figure 6 and in Supplementary figure 3). This fluid  
409 compartment is connected to the rest of the pseudocoelomic body fluids (see  
410 <https://www.wormatlas.org/hermaphrodite/introduction/mainframe.htm#IntroFIG2> and  
411 <http://wormatlas.org/hermaphrodite/pericellular/Periframeset.html>). According to WormAtlas, the  
412 pseudocoelomic fluid in this region is believed to reduce friction between adjacent tissues arising from  
413 vigorous pharyngeal movements during feeding. Solutes in fluid of this region seem to have  
414 unfettered access to the inner rim of the nerve ring; the mesh-like basal laminae that separate  
415 different tissues are fully permeable to neurotransmitters and other small molecules (Kandel et al.,  
416 2013). We therefore considered a possible link between the putative ability of distal GluTs to control  
417 ambient Glu concentration in pseudocoelomic body fluids and the location of AVA synapses closer to  
418 the inner rim of the nerve ring. Considering that our experiments thus far were performed on  
419 physically-restrained (but not pharmacologically-paralyzed) animals, we contemplated the possibility  
420 that the continuous pulsations of the pharynx and the increased mobility that nematodes show in the  
421 head region (causing the nerve ring to slide slightly back and forth on the isthmus, even in restrained  
422 animals), may facilitate perfusion of body fluids to the inner part of the nerve ring. Such perfusion can  
423 replace extracellular fluids rich in synaptically released Glu with fresh body fluids containing lower,  
424 ambient levels of Glu. If normal Glu clearance from the inner rim is aided by mechanical agitation and

425 perfusion, then paralysis might increase ambient Glu levels, potentially hampering Glu diffusion from  
426 these synapses, especially under conditions of increased synaptic activity and reduced Glu  
427 clearance. We therefore hypothesize that mechanical agitation of body fluids and perfusion of the  
428 inner rim of the nerve ring might underlie the privileged effect of distal GluTs on the ASH -> AVA  
429 synapses (an effect seen in Figures 1-3) and affect the clearance of Glu that reach AVA by spillover  
430 (Figures 4 and 5). In line with this hypothesis, we recently saw that under conditions where Glu  
431 accumulation leads to nematode excitotoxicity (Mano and Driscoll, 2009), the neurons that are most  
432 severely affected by neurodegeneration are not those that express the most GluRs, but those who  
433 form Glu synapses in the innermost face of the nerve ring (Feldmann et al., 2019).

434  
435 Further to this hypothesis, we suspect that inhibiting pharyngeal pumping and animal motility may  
436 prevent access of fresh body fluids to the synapses (in both WT and GluT KO animals), and interfere  
437 with the activity of synapses that depend on it. To test this hypothesis we first used tetramisole (Lewis  
438 et al., 1980; Lewis et al., 1987), which works as a constitutive, desensitizing agonist of nicotinic  
439 AcetylCholine Receptors (nAChRs) and is routinely used to paralyze worms for GCaMP-based  
440 imaging of specific neurons (Hendricks et al., 2012; Larsch et al., 2013; Kato et al., 2014) or the  
441 whole nervous system (Schrödel et al., 2013). However, we had some reservations on using  
442 tetramisole in our specific studies because of nAChR expression in AVA (Feng et al., 2006; Sherlekar  
443 et al., 2013), though spontaneous activity and indirect odor responses of AVA remain intact in the  
444 presence of tetramisole (Schrödel et al., 2013; Gordus et al., 2015). To demonstrate the effect of  
445 paralysis without disrupting neuronal activity, we also performed experiments using BDM (Goodman  
446 and Chalfie, 1998), which induces paralysis directly in the muscle by inhibiting myosin. Though BDM  
447 also has off-target effects, we speculate that similar effects seen when using either tetramisole or  
448 BDM are most likely to come from their common effect on paralysis.

450 Prior to our paralysis experiments, we needed to run a few controls. We first verified that the  
451 paralyzing agent, and especially the neuronally-active tetramisole, does not affect the activity of the  
452 presynaptic neuron. Indeed, by using GCaMP expressed in ASH we verified that tetramisole did not  
453 diminish ASH activity (Supplementary Figure 4). Secondly, we verified that a paired stimulation  
454 separated by 10 minute recovery shows no diminution of AVA response to the second stimulus. We  
455 performed this analysis for both AVA response to ASH stimulation with glycerol and for ASE  
456 stimulation with low concentration NaCl, confirming that the previously described AVA responses in  
457 the different GluT KOs (Figures 2 and 5) are preserved in paired stimuli of non-paralyzed animals  
458 (Supplementary figure 5).

459

460 To test the effect of paralysis on AVA responses to either ASH or ASE stimulation, we first applied  
461 stimulus under normal conditions, establishing the normal response in AVA in the specific animal. We  
462 then paralyzed the worm anterior with either tetramisole or BDM in absence of chemical stimulation  
463 for 10 minutes. Finally, we exposed the paralyzed animal to the same stimulus a second time. We  
464 found that paralysis with tetramisole eliminated the exaggerated response of AVA to ASH stimulation  
465 in *glt-3*, *glt-6*, *glt-7* KO mutants (Figure 7). Similarly, tetramisole-mediated paralysis abolished the  
466 response of AVA to ASE stimulation in *glt-1* and *glt-4* mutants (Figure 8). We observed similar effects  
467 when worms were paralyzed with BDM (Supplementary Figures 6 and 7), suggesting the effects we  
468 see do not arise from the various side effects of the two drugs, but from the shared effect of paralysis.  
469 If paralysis halts perfusion-mediated Glu clearance around AVA, then normal spontaneous activity  
470 (without stimulation) may result in Glu accumulation in AVA synapses during prolonged incubation  
471 with the paralyzing agent. In support of this hypothesis, we find GCaMP fluorescence in AVA to  
472 increase shortly after the onset of paralysis (Supplementary figure 8). However, we could not resolve  
473 the details of this effect with direct Glu measurements at this time, because the weak iGluSnFR  
474 signals in AVA neurites are not conducive to such protracted imaging.

475

476 In summary, our observations establish that the ability of the worm to continuously agitate interstitial /  
477 pseudocoelomic fluids is a critical factor in normal physiology of Glu signaling in some synapses of  
478 the aspiny and glia-deprived synaptic hub of the nematode. Additionally, this explains how distal  
479 GluTs display a privileged role in clearance of synapses located near the inner rim of the nerve ring.

480

481

## 482 Discussion

483

484 Our study focuses on synaptic clearance of Glu, a widely used non-degradable neurotransmitter, in a  
485 compact nervous system lacking spines and glia-mediated anatomical separation between synapses.  
486 We find that in the nematode nervous system, synaptic fidelity and circuit resolution is maintained by  
487 a robust, two-tier system of proximal and distal Glu clearance. We observe that specific GluTs have a  
488 privileged role in preserving accuracy and preventing spillover in specific circuits. We affirm that the  
489 privileged role of distal GluTs (*glt-3*, *glt-6*, & *glt-7*) on the ASH -> AVA/AVD/AVE avoidance circuit,  
490 seen previously at the behavioral level (Mano et al., 2007), can be observed at the neurophysiological  
491 level as hyperactivation of somatic Ca<sup>2+</sup> responses and dendritic Glu increase in postsynaptic AVA  
492 neurons (Figures 1, 2, and 3). Distal GluTs expressed on canal cells, through direct contact with  
493 pseudocoelomic body fluids, putatively maintain low ambient Glu concentrations to enable effective  
494 diffusion-mediated clearance. Although initially it was unclear to us how body fluids access these  
495 synapses, the notion of diffusion-mediated distal clearance in nematodes is in line with the anatomical  
496 observation that nematode synapses are aspiny and formed *en passant* (White et al., 1986),  
497 promoting perisynaptic diffusion. In contrast to the functional association of ASH synapses with distal  
498 GluTs, the accuracy of ASE -> AIA/AIB/AIY synapses in the low-salt sensing chemoattraction circuit  
499 is more influenced by the activity of the proximal GluTs, encoded by *glt-1* and *glt-4* (Figures 3 & 5): in  
500 the absence of these proximal GluTs, ASE circuit resolution is lost and Glu seems to spillover onto  
501 nearby circuits. The localization of ASE -> AIA/AIB/AIY synapses to the outer rim of the nerve ring  
502 (Figure 6 and Supplementary figure 3) offers a reasonably straightforward explanation to the  
503 privileged role of proximal GluTs on these synapses, as these synapses are closer to the *glt-1* –  
504 expressing hypodermis, head muscles, and glia. Spillover from other circuits into ASE synapses has  
505 yet to be examined, and remains an open question.

506

507 The location of ASH -> AVA/AVD/AVE synapses closer to the inner rim of the nerve ring and their  
508 functional association with distal GluTs (maintaining ambient Glu concentrations) is particularly  
509 intriguing. Careful examination of anatomical data in WormAtlas brought an important notion to our  
510 attention, namely that the space between the inner rim of the nerve ring and the isthmus of the  
511 pharynx is filled with pseudocoelomic body fluids, a compartment linked to fluids in the rest of the  
512 body. We propose that together with the intense mechanical agitation in this area, these body fluids  
513 might provide perfusion of the inner rim of the nerve ring, which is contiguous with the interstitial fluids  
514 in the neuropil extracellular space. Indeed, we observe that inhibiting fluid agitation (using two  
515 different paralyzing agents) obstructs chemical stimulation of AVA (either directly from ASH or by  
516 spillover from ASE, Figures 7 & 8). This notion is further supported by our recent observation that  
517 under conditions that cause *glt-3* KO –induced excitotoxicity, the most severely affected neurons are  
518 not those that express the most GluRs, but rather those that face the innermost rim of the nerve ring  
519 (Feldmann et al., 2019).

520  
521 In our model for the two-tier design of the Glu clearance system in *C. elegans*, Glu secreted closer to  
522 the outer rim of the nerve ring is preferentially cleared by GluTs expressed on the large structures  
523 that surround the nerve ring (hypodermis, head muscles, and glia), while Glu released closer to the  
524 inner rim of the nerve ring is preferentially cleared by circulating body fluids and distal uptake into the  
525 canal cell by distal GluTs (Supplementary figure 9). In this study, we did not investigate where Glu  
526 synapses of other circuits are located and how they are cleared, nor do we know if this two-tier  
527 organization of synaptic clearance is unique to Glu or is shared by other neurotransmitters. However,  
528 a broader applicability of this clearance mechanism is possible, since a number of neurotransmitters  
529 in *C. elegans* have been suggested to spill from their synapse of origin, and are therefore also  
530 candidates for long-range clearance (Chase et al., 2004; Jafari et al., 2011; Jobson et al., 2015).

531 There is considerable likelihood for this mechanism to affect additional neurotransmitters since the

532 canal cell expresses additional neurotransmitter transporters, such as the betaine/GABA transporter  
533 *snf-3* (Peden et al., 2013).

534  
535 The incomplete isolation of synapses throughout animal phyla suggests that in other animals, circuit  
536 resolution may be maintained not only by anatomical separation, but also by a balance between  
537 physical isolation and functional means of Glu clearance from both synaptic and perisynaptic or  
538 interstitial spaces. Our results on the physiology of Glu signaling and clearance in the nematode  
539 suggest this balance between anatomical and physiological means effectively prevents spillover and  
540 ensures signaling accuracy. In this view, vigorous clearance of Glu can compensate for anatomical  
541 shortcoming caused by the lack of glia isolation of synapses, as the existence of this two-tier Glu  
542 clearance system allows for preservation of circuit resolution in the nematode, even in the absence of  
543 anatomical synaptic isolation. Most intriguingly, we present data to support a hypothesis that agitation  
544 of interstitial fluids and mechanical perfusion might be a considerable factor in Glu clearance in some  
545 key synapses in the nematode, allowing for subsequent clearance by distal GluTs.

546  
547 It is interesting to note the correlation between synaptic structure and its physiology. Flat synapses  
548 such as those seen in the nematode's aspiny neurons are believed to be particularly efficient in  
549 passive cable propagation of receptor potential (Segal, 2010). This may hold special significance in  
550 the context of the (mostly) non-spiking graded signaling seen in the nematode's nervous system and  
551 the lack of a  $Mg^{2+}$  block in its NMDA-Rs (Brockie et al., 2001b), eliminating the "need" for dendritic  
552 spines in this animal. These structural characteristics seem to align with a clearance strategy that  
553 relies more heavily on clearance by diffusion and perfusion. It will therefore be interesting to study the  
554 effect of perfusion in the nervous systems of higher animals, which possess a complete spectrum of  
555 synaptic morphologies, glial involvement (Harris, 1999; Segal, 2010 ; Thomas et al., 2011), and a



556 range of levels of exposure to the glymphatic system (Nicholson and Hrabetova, 2017; Da Mesquita  
557 et al., 2018; Rasmussen et al., 2018).

558  
559 It is also worth noting that pulsations of mammalian brain parenchyma and CSF is readily observed  
560 (Hadaczek et al., 2006; Wagshul et al., 2011). In the murine brain, pulsatility of cerebral arteries has  
561 been recently shown to enhance interstitial fluid perfusion and is suggested to augment clearance of  
562 extracellular solutes (Iliff et al., 2013; Mestre et al., 2018). Pulsatility has been also used to preserve  
563 brain function after damage (Cohn et al., 2015; Vrselja et al., 2019). Furthermore, reduction of Glu  
564 clearance by agitation of interstitial fluid might have a pronounced role in brain damage during  
565 pulsation disturbances, and in conditions where extracellular space in the neuropil is reduced, such  
566 as brain edema (Sherpa et al., 2014) and other pathological conditions (Arbel-Ornath et al., 2013).  
567 Such disruptions might selectively affect glia-deprived flat synapses, where clearance by diffusion  
568 and bulk flow may be more critical. Continued study of the functional organization of neurotransmitter  
569 clearance in the nematode nervous system has the potential to elucidate unexpected and broadly  
570 applicable basic principles in the physiology of synaptic clearance. These insights might broaden the  
571 discussion of mechanisms that maintain accuracy of synaptic signaling and the resolution of neuronal  
572 circuits.

573

574 **Authors contribution**

575 IM, JC & KKL, designed the project, analyzed the data, and wrote the manuscript, JC & KKL  
576 performed all the imaging experiments, JCYW and PM performed the behavioral experiments.

577

## 578 References

- 579
- 580 Altun ZF, Herndon LA, Crocker C, Lints R, Hall DH (2002-2019) WormAtlas.org.
- 581 Arbel-Ornath M, Hudry E, Eikermann-Haerter K, Hou S, Gregory JL, Zhao L, Betensky RA, Frosch  
582 MP, Greenberg SM, Bacskai BJ (2013) Interstitial fluid drainage is impaired in ischemic stroke  
583 and Alzheimer's disease mouse models. *Acta neuropathologica* 126:353-364.
- 584 Barbour B, Keller BU, Llano I, Marty A (1994) Prolonged presence of glutamate during excitatory  
585 synaptic transmission to cerebellar Purkinje cells. *Neuron* 12:1331-1343.
- 586 Bargmann CI, Horvitz HR (1991) Chemosensory neurons with overlapping functions direct  
587 chemotaxis to multiple chemicals in *C. elegans*. *Neuron* 7:729-742.
- 588 Bergles DE, Diamond JS, Jahr CE (1999) Clearance of glutamate inside the synapse and beyond.  
589 *Curr Opin Neurobiol* 9:293-298.
- 590 Brady ST, Siegel GJ, Albers RW, Price DL (2012) Basic neurochemistry : principles of molecular,  
591 cellular, and medical neurobiology, 8th Edition. Amsterdam ; Boston: Elsevier Academic Press.
- 592 Brenner S (1974) The genetics of *Caenorhabditis elegans*. *Genetics* 77:71-94.
- 593 Brittin CA, Cook SJ, Hall DH, Emmons SW, Cohen N (2018) Volumetric reconstruction of main  
594 *Caenorhabditis elegans* neuropil at two different time points. bioRxiv:485771.
- 595 Brockie PJ, Maricq AV (2006) Ionotropic glutamate receptors: genetics, behavior and  
596 electrophysiology. In: WormBook (The *C. elegans* Research Community, ed):  
597 [www.wormbook.org](http://www.wormbook.org).
- 598 Brockie PJ, Madsen DM, Zheng Y, Mellem J, Maricq AV (2001a) Differential expression of glutamate  
599 receptor subunits in the nervous system of *Caenorhabditis elegans* and their regulation by the  
600 homeodomain protein UNC-42. *J Neurosci* 21:1510-1522.
- 601 Brockie PJ, Mellem JE, Hills T, Madsen DM, Maricq AV (2001b) The *C. elegans* glutamate receptor  
602 subunit NMR-1 is required for slow NMDA-activated currents that regulate reversal frequency  
603 during locomotion. *Neuron* 31:617-630.

- 604 Burbea M, Dreier L, Dittman JS, Grunwald ME, Kaplan JM (2002) Ubiquitin and AP180 Regulate the  
605 Abundance of GLR-1 Glutamate Receptors at Postsynaptic Elements in *C. elegans*. *Neuron*  
606 35:107-120.
- 607 Chalasani SH, Kato S, Albrecht DR, Nakagawa T, Abbott LF, Bargmann CI (2010) Neuropeptide  
608 feedback modifies odor-evoked dynamics in *Caenorhabditis elegans* olfactory neurons. *Nat*  
609 *Neurosci* 13:615-621.
- 610 Chalasani SH, Chronis N, Tsunozaki M, Gray JM, Ramot D, Goodman MB, Bargmann CI (2007)  
611 Dissecting a circuit for olfactory behaviour in *Caenorhabditis elegans*. *Nature* 450:63-70.
- 612 Chang HC, Rongo C (2005) Cytosolic tail sequences and subunit interactions are critical for synaptic  
613 localization of glutamate receptors. *J Cell Sci* 118:1945-1956.
- 614 Chase DL, Pepper JS, Koelle MR (2004) Mechanism of extrasynaptic dopamine signaling in  
615 *Caenorhabditis elegans*. *Nat Neurosci* 7:1096-1103.
- 616 Chatzigeorgiou M, Bang S, Hwang SW, Schafer WR (2013) *tmc-1* encodes a sodium-sensitive  
617 channel required for salt chemosensation in *C. elegans*. *Nature* 494:95-99.
- 618 Chaudhry FA, Lehre KP, van Lookeren Campagne M, Ottersen OP, Danbolt NC, Storm-Mathisen J  
619 (1995) Glutamate transporters in glial plasma membranes: highly differentiated localizations  
620 revealed by quantitative ultrastructural immunocytochemistry. *Neuron* 15:711-720.
- 621 Cho JY, Sternberg PW (2014) Multilevel modulation of a sensory motor circuit during *C. elegans*  
622 sleep and arousal. *Cell* 156:249-260.
- 623 Chronis N (2010) Worm chips: microtools for *C. elegans* biology. *Lab Chip* 10:432-437.
- 624 Chronis N, Zimmer M, Bargmann CI (2007) Microfluidics for in vivo imaging of neuronal and  
625 behavioral activity in *Caenorhabditis elegans*. *Nat Methods* 4:727-731.
- 626 Church DL, Guan KL, Lambie EJ (1995) Three genes of the MAP kinase cascade, *mek-2*, *mpk-1/sur-*  
627 *1* and *let-60 ras*, are required for meiotic cell cycle progression in *Caenorhabditis elegans*.  
628 *Development* 121:2525-2535.

- 629 Clements JD (1996) Transmitter timecourse in the synaptic cleft: its role in central synaptic function.  
630 Trends Neurosci 19:163-171.
- 631 Cohn WE, Timms DL, Frazier OH (2015) Total artificial hearts: past, present, and future. Nat Rev  
632 Cardiol 12:609-617.
- 633 Da Mesquita S, Fu Z, Kipnis J (2018) The Meningeal Lymphatic System: A New Player in  
634 Neurophysiology. Neuron 100:375-388.
- 635 Danbolt NC (2001) Glutamate uptake. Prog Neurobiol 65:1-105.
- 636 Del Rosario JS, Feldmann KG, Ahmed T, Amjad U, Ko B, An J, Mahmud T, Salama M, Mei S,  
637 Asemota D, Mano I (2015) Death Associated Protein Kinase (DAPK) –Mediated  
638 Neurodegenerative Mechanisms in Nematode Excitotoxicity. BMC Neuroscience 16:25.
- 639 Diamond JS (2002) A broad view of glutamate spillover. Nat Neurosci 5:291-292.
- 640 Feldmann KG, Chowdhury A, Becker J, McAlpin N, Ahmed T, Haider S, Xia JXR, Diaz K, Mehta MG,  
641 Mano I (2019) Non-Canonical Activation of CREB Mediates Neuroprotection in a *C. elegans*  
642 Model of Excitotoxic Necrosis. J Neurochem 148:531-549.
- 643 Feng Z, Li W, Ward A, Piggott BJ, Larkspur ER, Sternberg PW, Xu XZ (2006) A *C. elegans* model of  
644 nicotine-dependent behavior: regulation by TRP-family channels. Cell 127:621-633.
- 645 Goodman MB, Chalfie M (1998) Paralysis of worms by 2,3-butanedione monoxime (BDM). Worm  
646 Breeder's Gazette 15:9.
- 647 Goodman MB, Hall DH, Avery L, Lockery SR (1998) Active currents regulate sensitivity and dynamic  
648 range in *C. elegans* neurons. Neuron 20:763-772.
- 649 Gordus A, Pokala N, Levy S, Flavell SW, Bargmann CI (2015) Feedback from Network States  
650 Generates Variability in a Probabilistic Olfactory Circuit. Cell 161:215-227.
- 651 Hadaczek P, Yamashita Y, Mirek H, Tamas L, Bohn MC, Noble C, Park JW, Bankiewicz K (2006) The  
652 "perivascular pump" driven by arterial pulsation is a powerful mechanism for the distribution of  
653 therapeutic molecules within the brain. Mol Ther 14:69-78.

- 654 Harris KM (1999) Structure, development, and plasticity of dendritic spines. *Curr Opin Neurobiol*  
655 9:343-348.
- 656 Hart AC, Sims S, Kaplan JM (1995) Synaptic code for sensory modalities revealed by *C. elegans*  
657 GLR-1 glutamate receptor. *Nature* 378:82-85.
- 658 Hausser M, Spruston N, Stuart GJ (2000) Diversity and dynamics of dendritic signaling. *Science*  
659 290:739-744.
- 660 Hendricks M, Ha H, Maffey N, Zhang Y (2012) Compartmentalized calcium dynamics in a *C. elegans*  
661 interneuron encode head movement. *Nature* 487:99-103.
- 662 Hukema RK, Rademakers S, Dekkers MP, Burghoorn J, Jansen G (2006) Antagonistic sensory cues  
663 generate gustatory plasticity in *Caenorhabditis elegans*. *EMBO J* 25:312-322.
- 664 Iliff JJ, Wang M, Zeppenfeld DM, Venkataraman A, Plog BA, Liao Y, Deane R, Nedergaard M (2013)  
665 Cerebral arterial pulsation drives paravascular CSF-interstitial fluid exchange in the murine  
666 brain. *J Neurosci* 33:18190-18199.
- 667 Iwanir S, Tramm N, Nagy S, Wright C, Ish D, Biron D (2013) The microarchitecture of *C. elegans*  
668 behavior during lethargus: homeostatic bout dynamics, a typical body posture, and regulation  
669 by a central neuron. *Sleep* 36:385-395.
- 670 Jafari G, Xie Y, Kullyev A, Liang B, Sze JY (2011) Regulation of Extrasynaptic 5-HT by Serotonin  
671 Reuptake Transporter Function in 5-HT-Absorbing Neurons Underscores Adaptation Behavior  
672 in *Caenorhabditis elegans*. *J Neurosci* 31:8948-8957.
- 673 Jarrell TA, Wang Y, Bloniarz AE, Brittin CA, Xu M, Thomson JN, Albertson DG, Hall DH, Emmons  
674 SW (2012) The Connectome of a Decision-Making Neural Network. *Science* 337:437-444.
- 675 Jobson MA, Valdez CM, Gardner J, Garcia LR, Jorgensen EM, Beg AA (2015) Spillover Transmission  
676 Is Mediated by the Excitatory GABA Receptor LGC-35 in *C. elegans*. *J Neurosci* 35:2803-  
677 2816.
- 678 Kandel ER, Schwartz JH, Jessell TM, Siegelbaum SA, Hudspeth AJ (2013) Principles of neural  
679 science, 5th Edition. New York: McGraw-Hill.

- 680 Kaplan JM, Horvitz HR (1993) A dual mechanosensory and chemosensory neuron in *Caenorhabditis*  
681 *elegans*. Proc Natl Acad Sci U S A 90:2227-2231.
- 682 Kato S, Xu Y, Cho CE, Abbott LF, Bargmann CI (2014) Temporal Responses of *C. elegans*  
683 Chemosensory Neurons Are Preserved in Behavioral Dynamics. Neuron 81:616-628.
- 684 Katz M, Corson F, Iwanir S, Biron D, Shaham S (2018) Glia Modulate a Neuronal Circuit for  
685 Locomotion Suppression during Sleep in *C. elegans*. Cell Rep 22:2575-2583.
- 686 Korogod N, Petersen CC, Knott GW (2015) Ultrastructural analysis of adult mouse neocortex  
687 comparing aldehyde perfusion with cryo fixation. Elife 4:e05793.
- 688 Kullmann DM, Asztely F (1998) Extrasynaptic glutamate spillover in the hippocampus: evidence and  
689 implications. Trends Neurosci 21:8-14.
- 690 Kunitomo H, Sato H, Iwata R, Satoh Y, Ohno H, Yamada K, Iino Y (2013) Concentration memory-  
691 dependent synaptic plasticity of a taste circuit regulates salt concentration chemotaxis in  
692 *Caenorhabditis elegans*. Nat Commun 4:2210.
- 693 Kuramochi M, Doi M (2018) An Excitatory/Inhibitory Switch From Asymmetric Sensory Neurons  
694 Defines Postsynaptic Tuning for a Rapid Response to NaCl in *Caenorhabditis elegans*. Front  
695 Mol Neurosci 11:484.
- 696 Larsch J, Ventimiglia D, Bargmann CI, Albrecht DR (2013) High-throughput imaging of neuronal  
697 activity in *Caenorhabditis elegans*. Proc Natl Acad Sci U S A 110:E4266-4273.
- 698 Leinwand SG, Chalasani SH (2013) Neuropeptide signaling remodels chemosensory circuit  
699 composition in *Caenorhabditis elegans*. Nat Neurosci 16:1461-1467.
- 700 Lewis JA, Wu CH, Levine JH, Berg H (1980) Levamisole-resistant mutants of the nematode  
701 *Caenorhabditis elegans* appear to lack pharmacological acetylcholine receptors. Neuroscience  
702 5:967-989.
- 703 Lewis JA, Elmer JS, Skimming J, McLafferty S, Fleming J, McGee T (1987) Cholinergic receptor  
704 mutants of the nematode *Caenorhabditis elegans*. J Neurosci 7:3059-3071.
- 705 Magee JC (2000) Dendritic integration of excitatory synaptic input. Nat Rev Neurosci 1:181-190.

- 706 Mano I, Driscoll M (2009) *C. elegans* Glutamate Transporter Deletion Induces AMPA-  
707 Receptor/Adenylyl Cyclase 9-Dependent Excitotoxicity. *J Neurochem* 108:1373-1384.
- 708 Mano I, Straud S, Driscoll M (2007) *Caenorhabditis elegans* Glutamate Transporters Influence  
709 Synaptic Function and Behavior at Sites Distant from the Synapse. *J Biol Chem* 282:34412-  
710 34419.
- 711 Marvin JS, Borghuis BG, Tian L, Cichon J, Harnett MT, Akerboom J, Gordus A, Renninger SL, Chen  
712 T-W, Bargmann CI, Orger MB, Schreiter ER, Demb JB, Gan W-B, Hires SA, Looger LL (2013)  
713 An optimized fluorescent probe for visualizing glutamate neurotransmission. *Nat Meth* 10:162-  
714 170.
- 715 Mellem JE, Brockie PJ, Zheng Y, Madsen DM, Maricq AV (2002) Decoding of Polymodal Sensory  
716 Stimuli by Postsynaptic Glutamate Receptors in *C. elegans*. *Neuron* 36:933-944.
- 717 Mestre H, Tithof J, Du T, Song W, Peng W, Sweeney AM, Olveda G, Thomas JH, Nedergaard M,  
718 Kelley DH (2018) Flow of cerebrospinal fluid is driven by arterial pulsations and is reduced in  
719 hypertension. *Nat Commun* 9:4878.
- 720 Mojsilovic-Petrovic J, Nedelsky N, Boccitto M, Mano I, Georgiades SN, Zhou W, Liu Y, Neve RL,  
721 Taylor JP, Driscoll M, Clardy J, Merry D, Kalb RG (2009) FOXO3a is broadly neuroprotective  
722 *in vitro* and *in vivo* against insults implicated in motor neuron diseases. *J Neurosci* 29:8236-  
723 8247.
- 724 Nicholson C, Hrabetova S (2017) Brain Extracellular Space: The Final Frontier of Neuroscience.  
725 *Biophys J* 113:2133-2142.
- 726 Oda S, Tomioka M, Iino Y (2011) Neuronal plasticity regulated by the insulin-like signaling pathway  
727 underlies salt chemotaxis learning in *Caenorhabditis elegans*. *J Neurophysiol* 106:301-308.
- 728 Ostroff LE, Manzur MK, Cain CK, Ledoux JE (2014) Synapses lacking astrocyte appear in the  
729 amygdala during consolidation of Pavlovian threat conditioning. *J Comp Neurol* 522:2152-  
730 2163.



- 731 Peden AS, Mac P, Fei Y-J, Castro C, Jiang G, Murfitt KJ, Miska EA, Griffin JL, Ganapathy V,  
732 Jorgensen EM (2013) Betaine acts on a ligand-gated ion channel in the nervous system of the  
733 nematode *C. elegans*. *Nat Neurosci* 16:1794-1801.
- 734 Petralia RS, Wang YX, Mattson MP, Yao PJ (2016) The Diversity of Spine Synapses in Animals.  
735 *Neuromolecular Med* 18:497-539.
- 736 Piggott BJ, Liu J, Feng Z, Wescott Seth A, Xu XZS (2011) The Neural Circuits and Synaptic  
737 Mechanisms Underlying Motor Initiation in *C. elegans*. *Cell* 147:922-933.
- 738 Rall W (1959) Branching dendritic trees and motoneuron membrane resistivity. *Exp Neurol* 1:491-  
739 527.
- 740 Rasmussen MK, Mestre H, Nedergaard M (2018) The glymphatic pathway in neurological disorders.  
741 *Lancet neurology* 17:1016-1024.
- 742 Schrödel T, Prevedel R, Aumayr K, Zimmer M, Vaziri A (2013) Brain-wide 3D imaging of neuronal  
743 activity in *Caenorhabditis elegans* with sculpted light. *Nat Methods*.
- 744 Segal M (2010) Dendritic spines, synaptic plasticity and neuronal survival: activity shapes dendritic  
745 spines to enhance neuronal viability. *Eur J Neurosci* 31:2178-2184.
- 746 Sherlekar AL, Janssen A, Siehr MS, Koo PK, Caflich L, Boggess M, Lints R (2013) The *C. elegans*  
747 male exercises directional control during mating through cholinergic regulation of sex-shared  
748 command interneurons. *PLoS One* 8:e60597.
- 749 Sherpa AD, van de Nes P, Xiao F, Weedon J, Hrabetova S (2014) Gliotoxin-induced swelling of  
750 astrocytes hinders diffusion in brain extracellular space via formation of dead-space  
751 microdomains. *Glia* 62:1053-1065.
- 752 Shipley FB, Clark CM, Alkema MJ, Leifer AM (2014) Simultaneous optogenetic manipulation and  
753 calcium imaging in freely moving *C. elegans*. *Frontiers in Neural Circuits* 8:28.
- 754 Singhvi A, Shaham S (2019) Glia-Neuron Interactions in *Caenorhabditis elegans*. *Annu Rev Neurosci*  
755 42.
- 756 Sudhof TC (2018) Towards an Understanding of Synapse Formation. *Neuron* 100:276-293.

- 757 Suzuki H, Thiele TR, Faumont S, Ezcurra M, Lockery SR, Schafer WR (2008) Functional asymmetry  
758 in *Caenorhabditis elegans* taste neurons and its computational role in chemotaxis. *Nature*  
759 454:114-117.
- 760 Tarasoff-Conway JM, Carare RO, Osorio RS, Glodzik L, Butler T, Fieremans E, Axel L, Rusinek H,  
761 Nicholson C, Zlokovic BV, Frangione B, Blennow K, Menard J, Zetterberg H, Wisniewski T, de  
762 Leon MJ (2015) Clearance systems in the brain-implications for Alzheimer disease. *Nat Rev*  
763 *Neurol* 11:457-470.
- 764 Tehrani N, Del Rosario J, Dominguez M, Kalb R, Mano I (2014) The Insulin/IGF Signaling Regulators  
765 Cytohesin/GRP-1 and PIP5K/PPK-1 Modulate Susceptibility to Excitotoxicity in *C. elegans*.  
766 *PLoS ONE* 9:e113060.
- 767 Thomas CG, Tian H, Diamond JS (2011) The Relative Roles of Diffusion and Uptake in Clearing  
768 Synaptically Released Glutamate Change during Early Postnatal Development. *J Neurosci*  
769 31:4743-4754.
- 770 Tonnesen J, Inavalli V, Nagerl UV (2018) Super-Resolution Imaging of the Extracellular Space in  
771 Living Brain Tissue. *Cell* 172:1108-1121.
- 772 Tzingounis AV, Wadiche JI (2007) Glutamate transporters: confining runaway excitation by shaping  
773 synaptic transmission. *Nat Rev Neurosci* 8:935-947.
- 774 Vandenberg RJ, Ryan RM (2013) Mechanisms of Glutamate Transport. *Physiological Reviews*  
775 93:1621-1657.
- 776 Ventura R, Harris KM (1999) Three-dimensional relationships between hippocampal synapses and  
777 astrocytes. *J Neurosci* 19:6897-6906.
- 778 Vrselja Z, Daniele SG, Silbereis J, Talpo F, Morozov YM, Sousa AMM, Tanaka BS, Skarica M,  
779 Pletikos M, Kaur N, Zhuang ZW, Liu Z, Alkawadri R, Sinusas AJ, Latham SR, Waxman SG,  
780 Sestan N (2019) Restoration of brain circulation and cellular functions hours post-mortem.  
781 *Nature* 568:336-343.

- 782 Wagshul ME, Eide PK, Madsen JR (2011) The pulsating brain: A review of experimental and clinical  
783 studies of intracranial pulsatility. *Fluids and barriers of the CNS* 8:5.
- 784 Wang L, Sato H, Satoh Y, Tomioka M, Kunitomo H, Iino Y (2017) A Gustatory Neural Circuit of  
785 *Caenorhabditis elegans* Generates Memory-Dependent Behaviors in Na<sup>+</sup> Chemotaxis. *J*  
786 *Neurosci* 37:2097–2111.
- 787 White JG, Southgate E, Thomson JN, Brenner S (1986) The structure of the nervous system of  
788 *Caenorhabditis elegans*. *Philos Trans R Soc Lond* 314:1-340.
- 789 Yuste R (2013) Electrical compartmentalization in dendritic spines. *Annu Rev Neurosci* 36:429-449.
- 790 Zheng Y, Brockie PJ, Mellem JE, Madsen DM, Maricq AV (1999) Neuronal control of locomotion in *C.*  
791 *elegans* is modified by a dominant mutation in the GLR-1 ionotropic glutamate receptor.  
792 *Neuron* 24:347-361.

793

794

## 795 Figure Legends

### 796 797 798 **Figure 1: Distal GluT KOs disrupt behaviors mediated by ASH -> AVA avoidance circuit.**

799 (A) Duration of forward runs in spontaneous mobility assay. *glt-3* (distal GluT KO) animals are  
800 impaired in forward run duration, although the duration of forward run of proximal GluT KO animals  
801 (*glt-1*, or *glt-4*) is intact. The *nmr-1; glr-2; glr-1* strain (where all ionotropic GluR responses of the  
802 avoidance circuit are eliminated) is used as a control where Glu signaling is reduced, resulting in  
803 excessive forward mobility. (B) Nose touch response of distal GluT KOs, *glt-3* and *glt-3, glt-6, glt-7*  
804 KO is reduced. Colored bars represent the fraction of animals responding to nose touch. Both  
805 underactive (*nmr-1; glr-2; glr-1* animals) and overactive (*glt-3* and *glt-3, glt-6, glt-7* animals) Glu  
806 signaling causes impaired response to nose touch. Significance of differences from control (WT, N2  
807 strain) mean (A) or distribution (B) is indicated by asterisks. \*\*  $P = 0.10$  ; \*\*\*  $P < 0.001$ . Student's t-  
808 test with Welch's correction was used in both (A) and (B). Error bars indicate SEM; n = 15-120 per  
809 genotype (A), n = 45-90 per genotype (B).

### 810 811 812 **Figure 2 : Distal GluT KOs enhance Glu signaling in ASH -> AVA synapse.**

813 Glycerol-induced calcium responses in AVA neurons of WT and GluT KO animals. (A) Average  
814 traces of changes in GCaMP3 fluorescence. Shaded areas above and below the trace represent  
815 SEM. The fluorescence intensity of the first 4 s of the recording was averaged to serve as the  
816 baseline fluorescence,  $F_0$ . Beginning at  $t = 4$  s, light gray shading indicates 20 s period of exposure to  
817 a 1 M glycerol stimulus. Within this exposure period, green box indicates a window of 10 s, after  
818 neural response to stimulation reached a relative stability, for which the steady-state fluorescence

819 change ( $\Delta F$ ) was averaged and presented in the bar graphs. **(B)** Average steady-state response of  
820 each strain is compared to the average steady state response of WT animals (indicated as a  
821 horizontal line). Error bars represent SEM. \*\*\*  $P < 0.001$ , ANOVA with Bonferroni correction.  $n = 15$   
822 for each strain.

823

824

825 **Figure 3: Distal GluT KO animals promote accumulation of Glu at the AVA synapse following 1M**  
826 **glycerol stimulation.**

827 Glycerol-induced changes in Glu concentrations in nerve ring processes of AVA neurons in WT and  
828 GluT KO animals. Average traces of changes in iGluSnFR fluorescence and averaged steady-state  
829 responses to a 1 M glycerol stimulus are analyzed similarly to those in Figure 2. Error bars represent  
830 SEM. \*\*\* $P < 0.001$ , ANOVA with Bonferroni correction..  $n = 5-6$  for each strain.

831

832

833 **Figure 4: Absence of proximal GluTs abnormally switches worms response to low**  
834 **concentration NaCl from attraction to avoidance.**

835 A drop of buffer containing the indicated concentration of NaCl was presented to the tail of a forward-  
836 moving worm. Animals presented either an avoidance response (stopping/reversing) or an attraction  
837 response (continuing forward traversal). Avoidance index is the percentage of worms that presented  
838 an avoidance response. Difference from control (WT) distribution at each NaCl concentration is  
839 indicated by asterisks. \*  $P < 0.05$ , Chi-square test. Error bars indicate SEM;  $n = 11-62$  for each data  
840 point.

841

842

843 **Figure 5: Proximal GluT KO animals cause AVA to respond to low NaCl concentrations.**

844 Low-salt-induced calcium responses in AVA neurons of WT and GluT KO animals. Average traces of  
845 changes in GCaMP3 fluorescence and averaged steady-state responses to a 1 mM NaCl stimulus  
846 are analyzed similarly to those in Figure 2. \*\*\*  $P < 0.001$ , ANOVA with Bonferroni correction.  $n = 15$ -  
847 16 for each strain.

848

849

850 **Figure 6: Analysis of EM data from the *C. elegans* nerve ring suggests that synapses of**  
851 **different circuits are found in great proximity.**

852 This figure is based on a section of the original EM image from White et al's "The Mind of the Worm"  
853 (through WormAtlas.org and WormWiring.org). The image corresponds to slice # 87, where penciled  
854 numbers mark cell assignments. Our assignment of synapses is based on analysis by the Hall and  
855 Emmons labs, as appearing in WormWiring.org. We marked tentative cell outlines with limited  
856 accuracy (based on our best estimate from this image, and the images of adjacent slices). Cells of  
857 the avoidance circuit (ASH -> AVA/AVD/AVE) are marked with a blue outline; cells of the salt  
858 chemoattraction circuit (ASE -> AIA/AIB/AIY) are marked with a red outline. In both cases,  
859 presynaptic terminals are marked in a dashed line. The image shows a chemical synapse between  
860 presynaptic ASHL (cell #7) and postsynaptic AVDL (cell #74) and AVBL (cell #2) (although AVAL is  
861 not seen here, in the immediately following slices AVAL joins this synapse, as it squeezes between  
862 AVDL and AVBL). Another chemical synapse is formed between presynaptic ASEL (cell #13) and  
863 postsynaptic AIYL (cell #31) and AIBL (cell #23). Blue shade at the bottom right indicates the  
864 pseudocoelomic area between the nerve ring and the pharynx containing the end of the muscle arms  
865 and GLR cells. The insert in the upper right shows a zoom-out view of this area, with a red box

866 corresponding approximately to the enlarged area. Key to cell numbers is based on cytoshow.org .  
867 Note: these numbers are only part of the full cell designation, so some numbers appear more than  
868 once. Key: 1 – AIAL ; 2 - AVBL ; 3 (should have been 18) - URADL ; 4 (written upside down on lower  
869 right) DLV4 DBW muscle arm ; 6 - URBL ; 7 - ASHL ; 8 – AIZL ; 9 - ; 10 - ; 11 - ADFL ; 12 (between  
870 red and blue marked synapses) – AWAL ; 12 (lower center part of image) – ADAL ; 12 (written upside  
871 down, lower right) - DLV12 DBW muscle arm ; 13 - ASEL ; 14 - RIR ; 15 (lower left) – RID ; 15 -  
872 OLQDL ; 16 (center, between red and blue marked synapses) - AWBL ; 16 (lower center) – URYDL ;  
873 17 – IL1DL ; 19 – IL2DL ; 21 - ASKL ; 22 - AWCL ; 23 - AIBL ; 25 - AFDL ; 31 (top left, outlined in red)  
874 – AIYL ; 31 (center left, no outline) – PVPL ; 34 - PVCR ; 38 - AVHR ; 39 - PVNL ; 42 – HSNL ; 49 –  
875 HSNR ; 55 - PVR ; 71 - AINL ; 72 – AVHL ; 73 AVJL ; 74 - AVDL ; 75 – AVJR ; 111 – PVNR

876

877

878 **Figure 7: Tetramisole-induced paralysis eliminates exaggerated responses in the ASH -> AVA**  
879 **synapse to 1 M glycerol.**

880 Head muscle and pharyngeal paralysis induced by exposure to tetramisole caused loss in AVA  
881 response of *glt-3,6,7* mutants to stimulation by 1 M glycerol. Changes in AVA GCaMP fluorescence  
882 intensity in response to 1 M glycerol stimulation are shown before **(A)** and following **(B)** 10 min  
883 paralysis treatment with tetramisole. Traces are labeled as in previous slides, but steady state  
884 response of each animal was calculated separately. **(C)** Paired comparison of steady-state  
885 responses in individual animals before and following paralysis are shown as line-connected dots. The  
886 average of responses in each group appears as a horizontal thin bar with error bars. Dotted  
887 horizontal line represents the average response of WT animals before paralysis, to which the other  
888 responses are compared. Statistical significance is denoted with asterisks. \*  $P = 0.0283$ , ANOVA with  
889 Bonferroni correction.  $n = 5-6$  per strain.

890

891

892 **Figure 8: Putative spillover from ASE onto AVA is eliminated by tetramisole-induced head**  
893 **paralysis.**

894 Head muscle and pharyngeal paralysis induced by exposure to tetramisole caused loss in AVA  
895 response of *glt-1* and *glt-4* mutants to stimulation by 1 mM NaCl. Changes in AVA GCaMP intensity in  
896 response to 1 mM NaCl stimulation analyzed as in figure 7. \*  $P = 0.0132$  ; \*\*  $P = 0.0077$ , ANOVA with  
897 Bonferroni correction. n = 5-9 per strain.

898

899

900



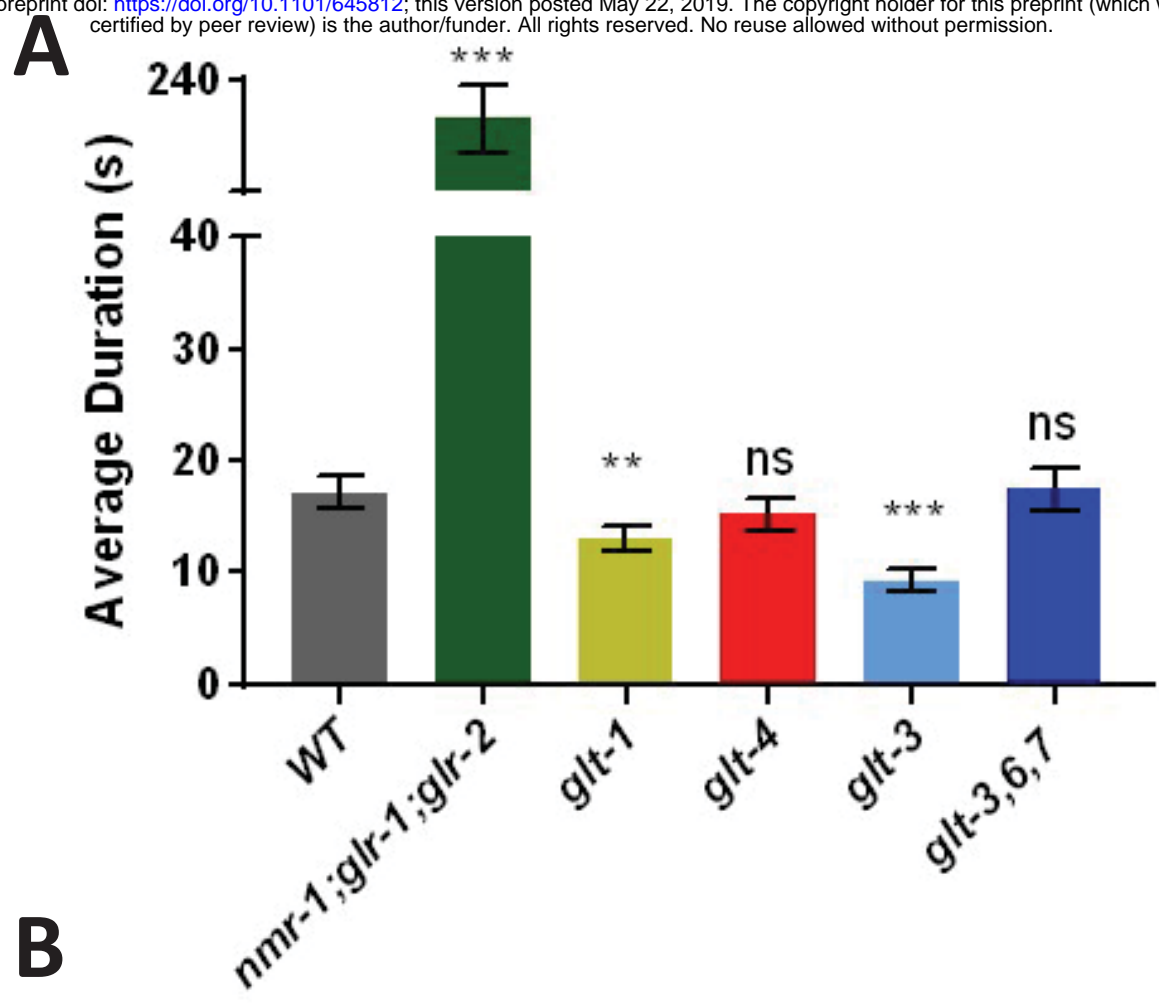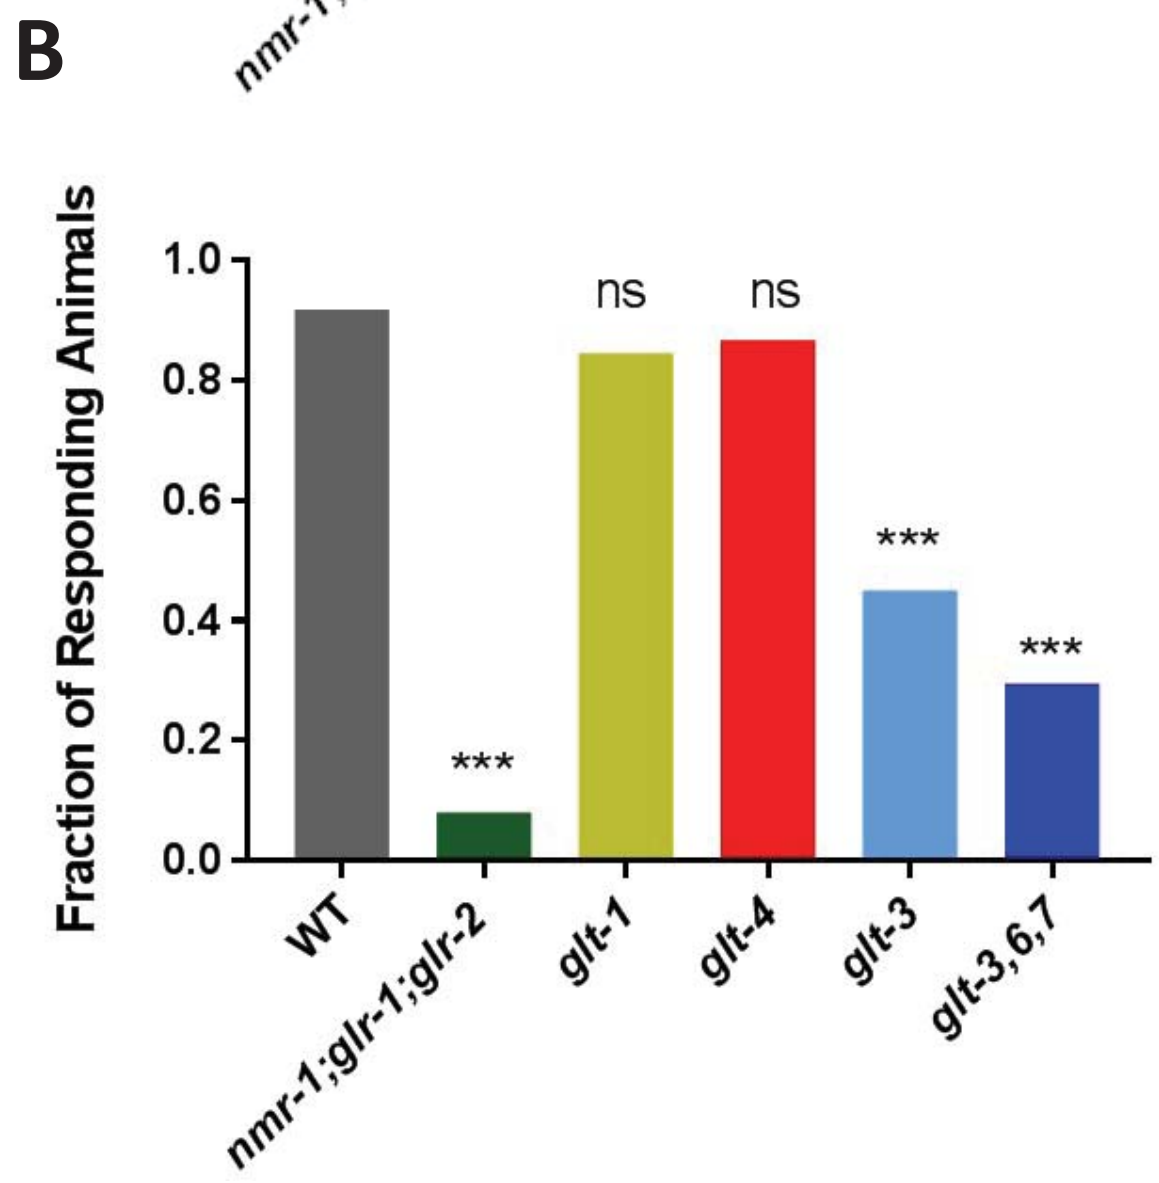

Figure 2

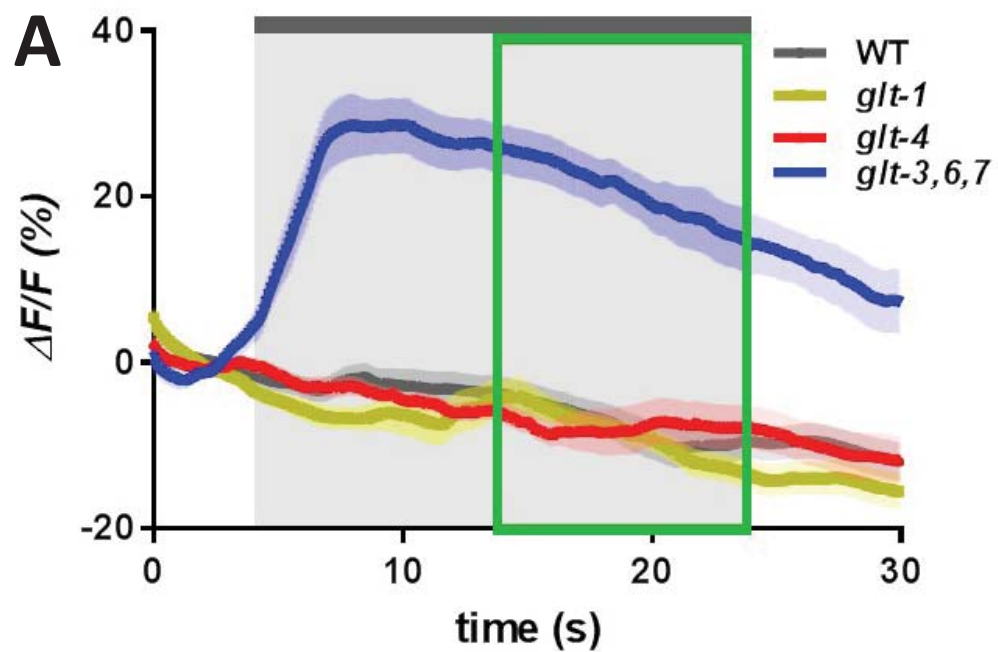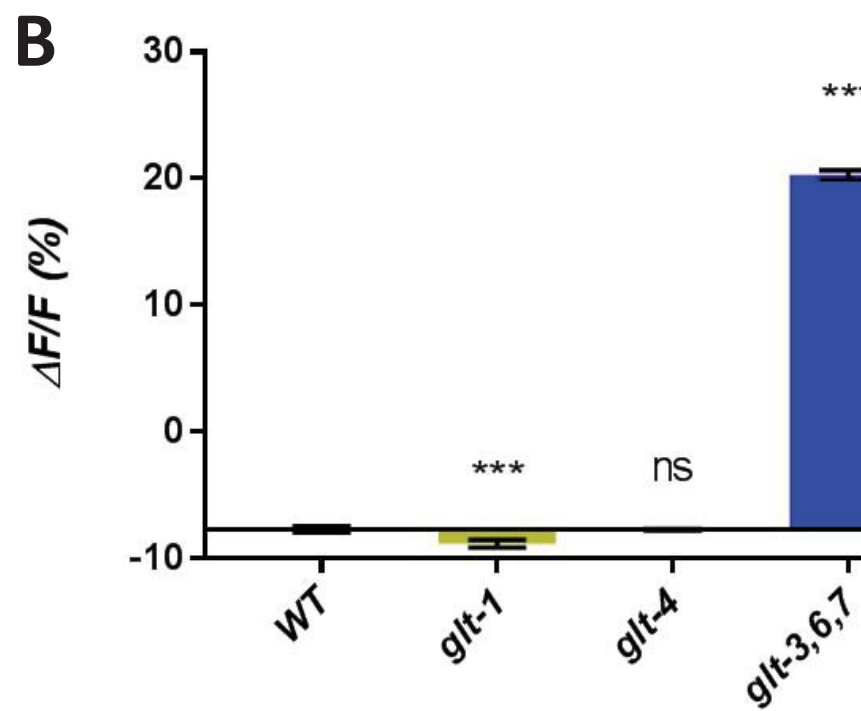

Figure 3

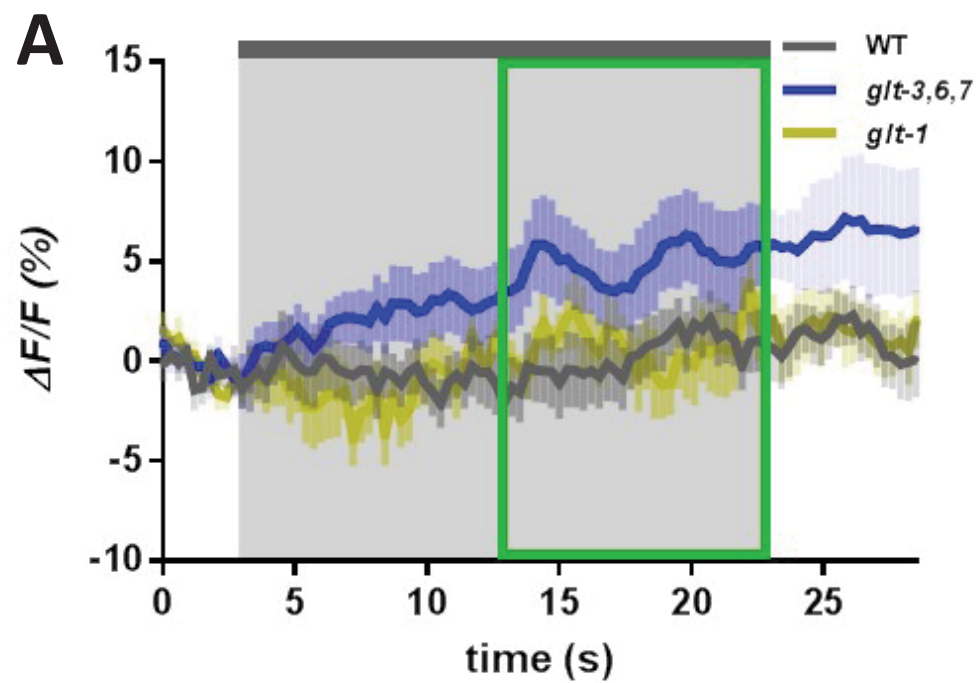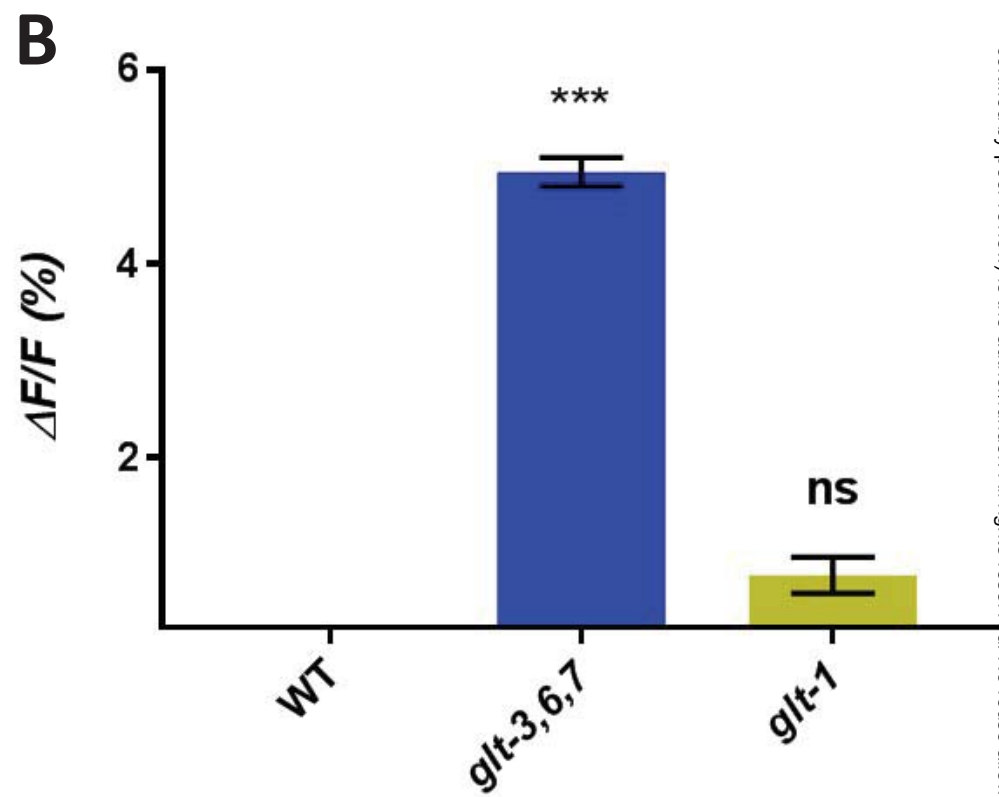

Figure 4

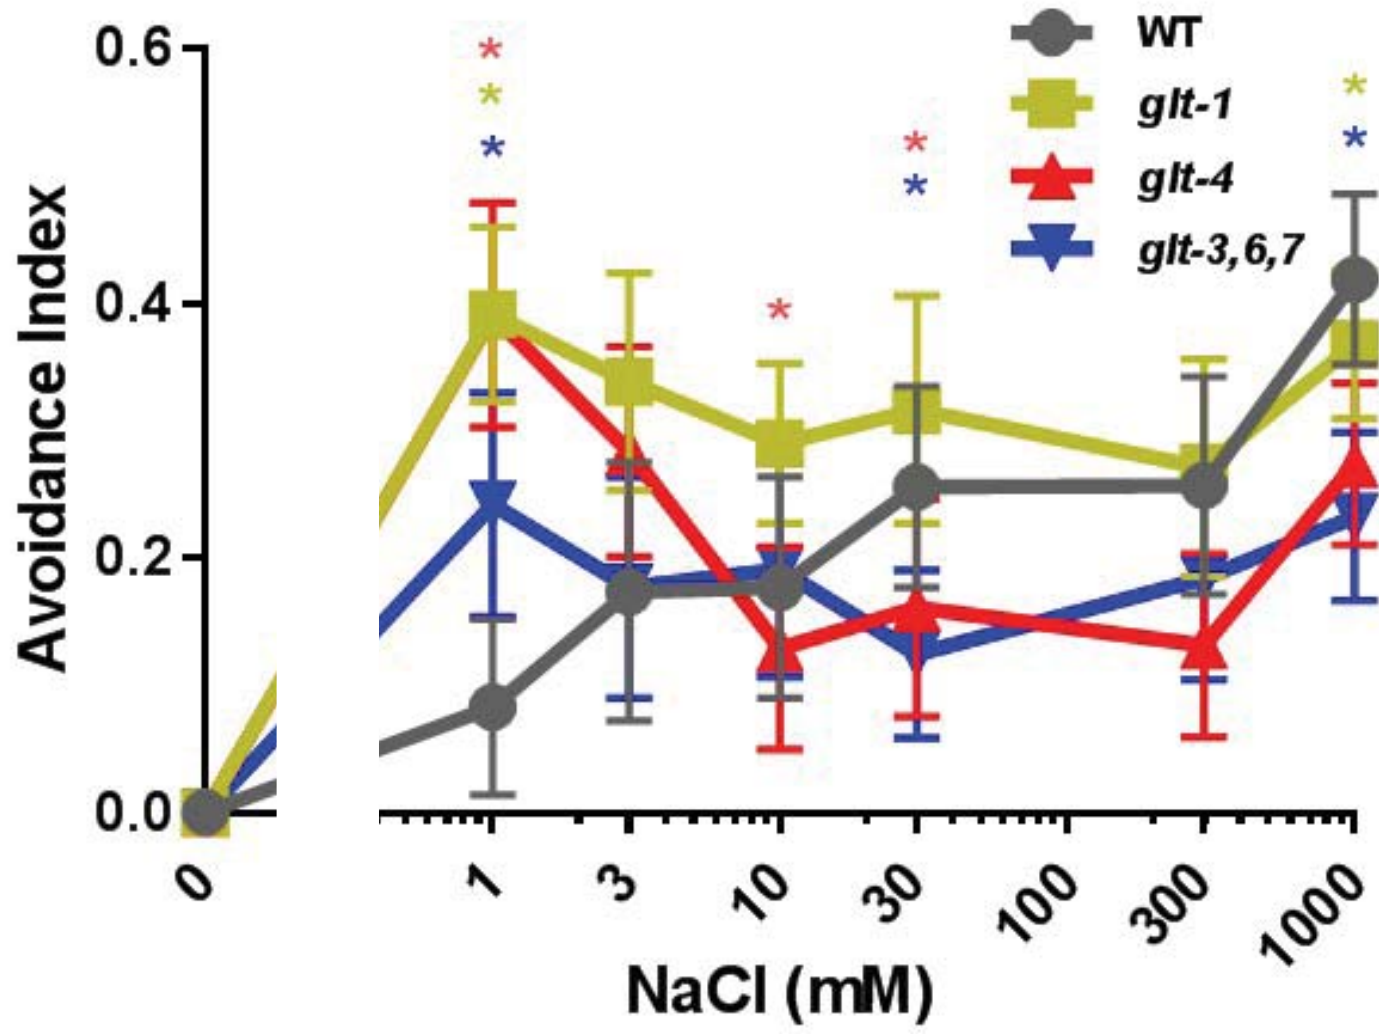

Figure 5

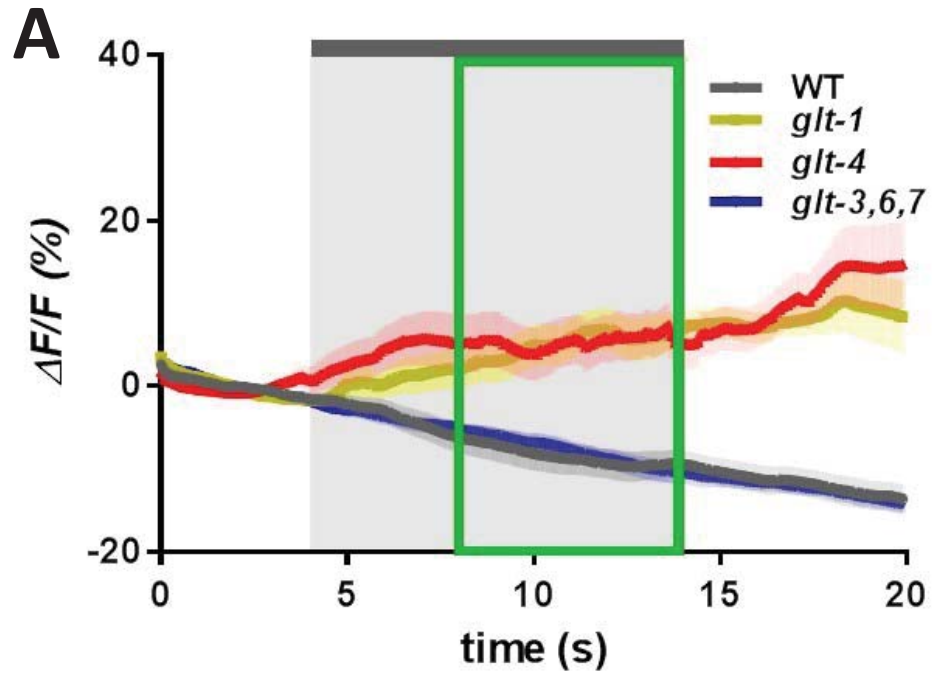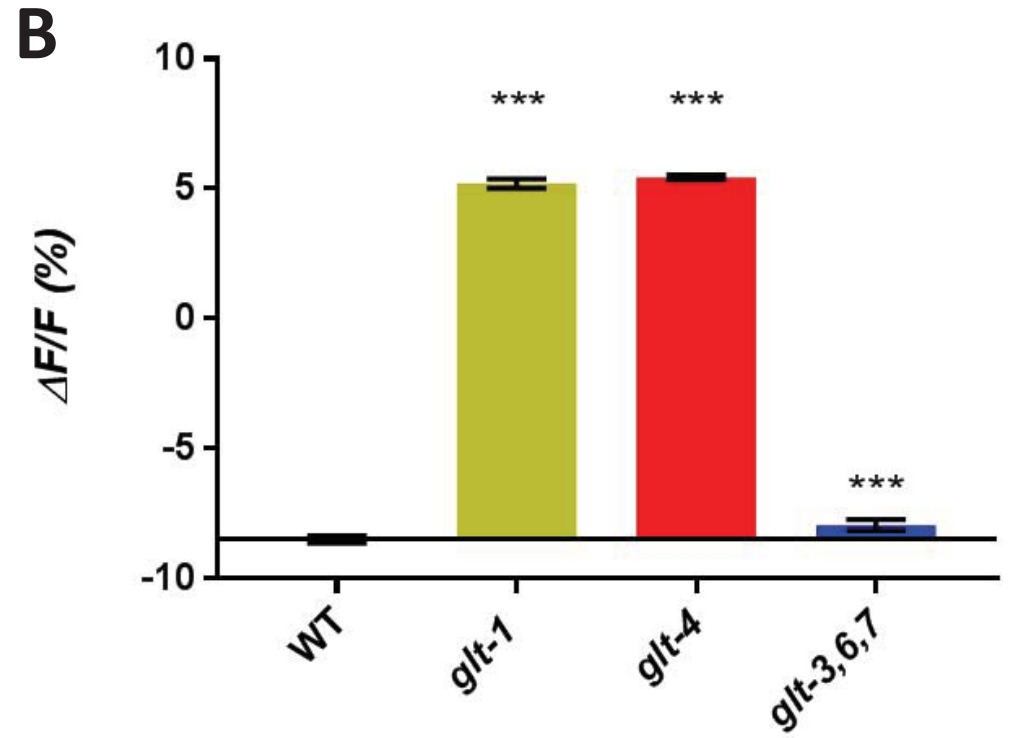



Figure 6

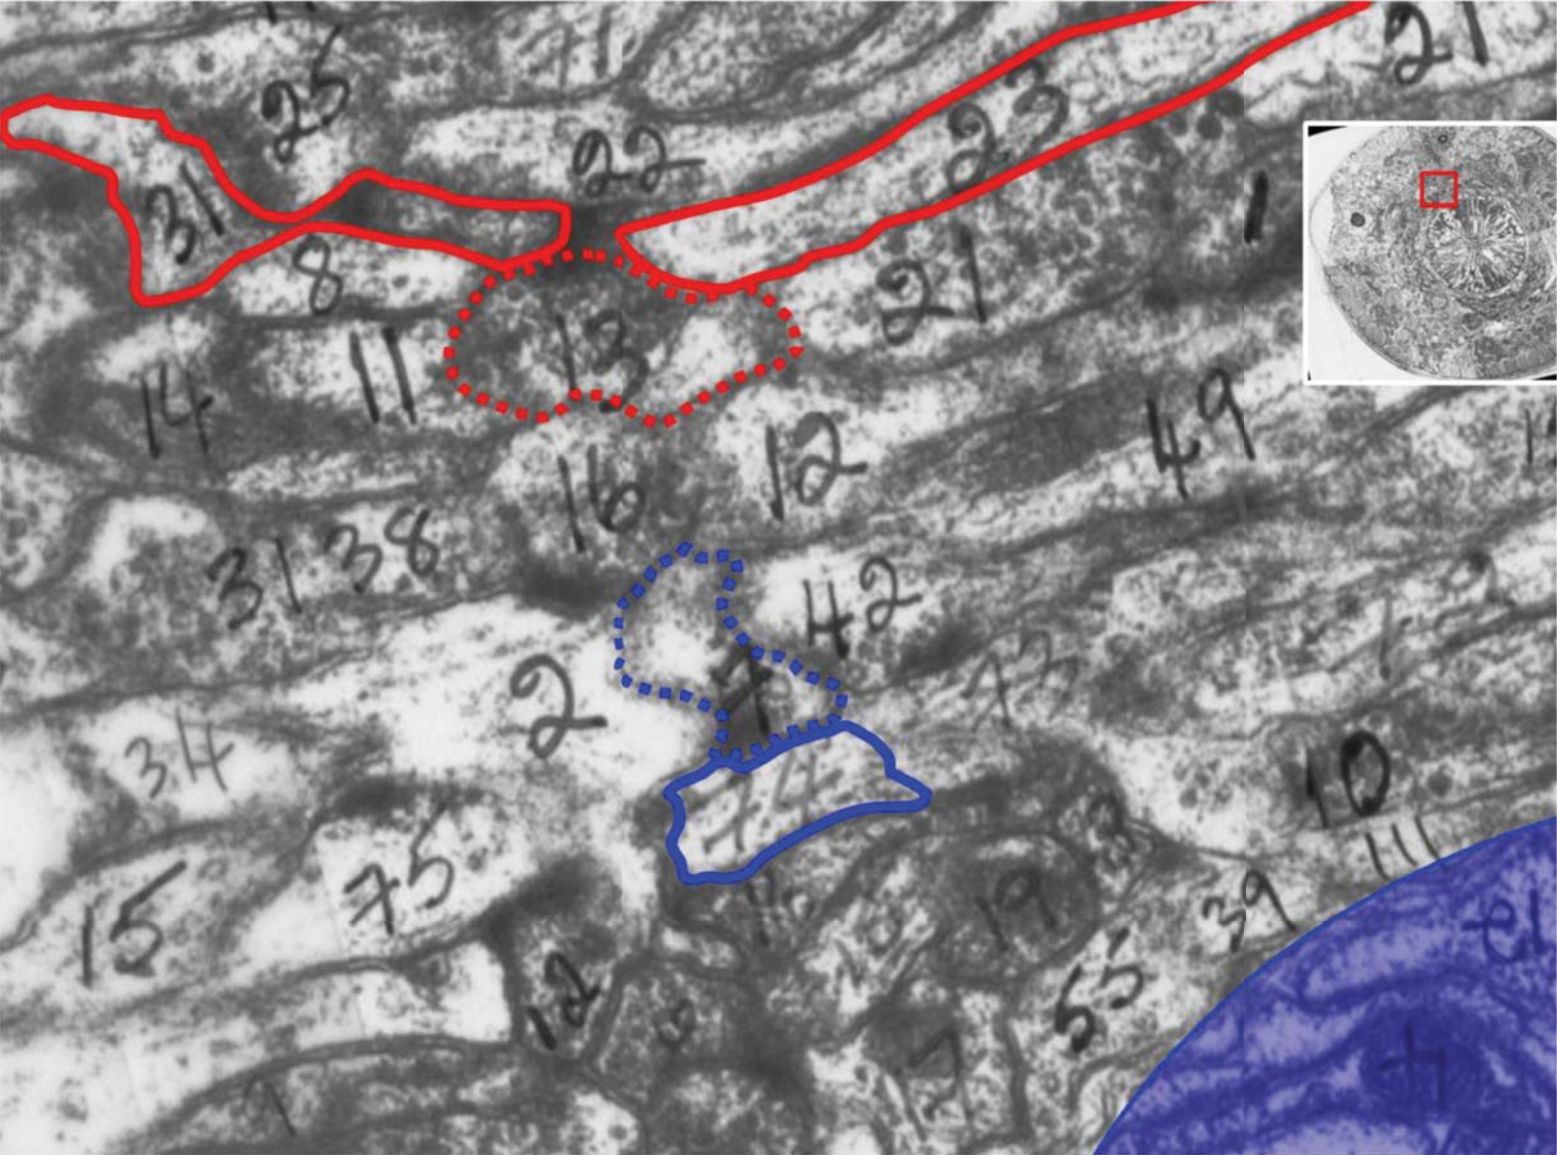

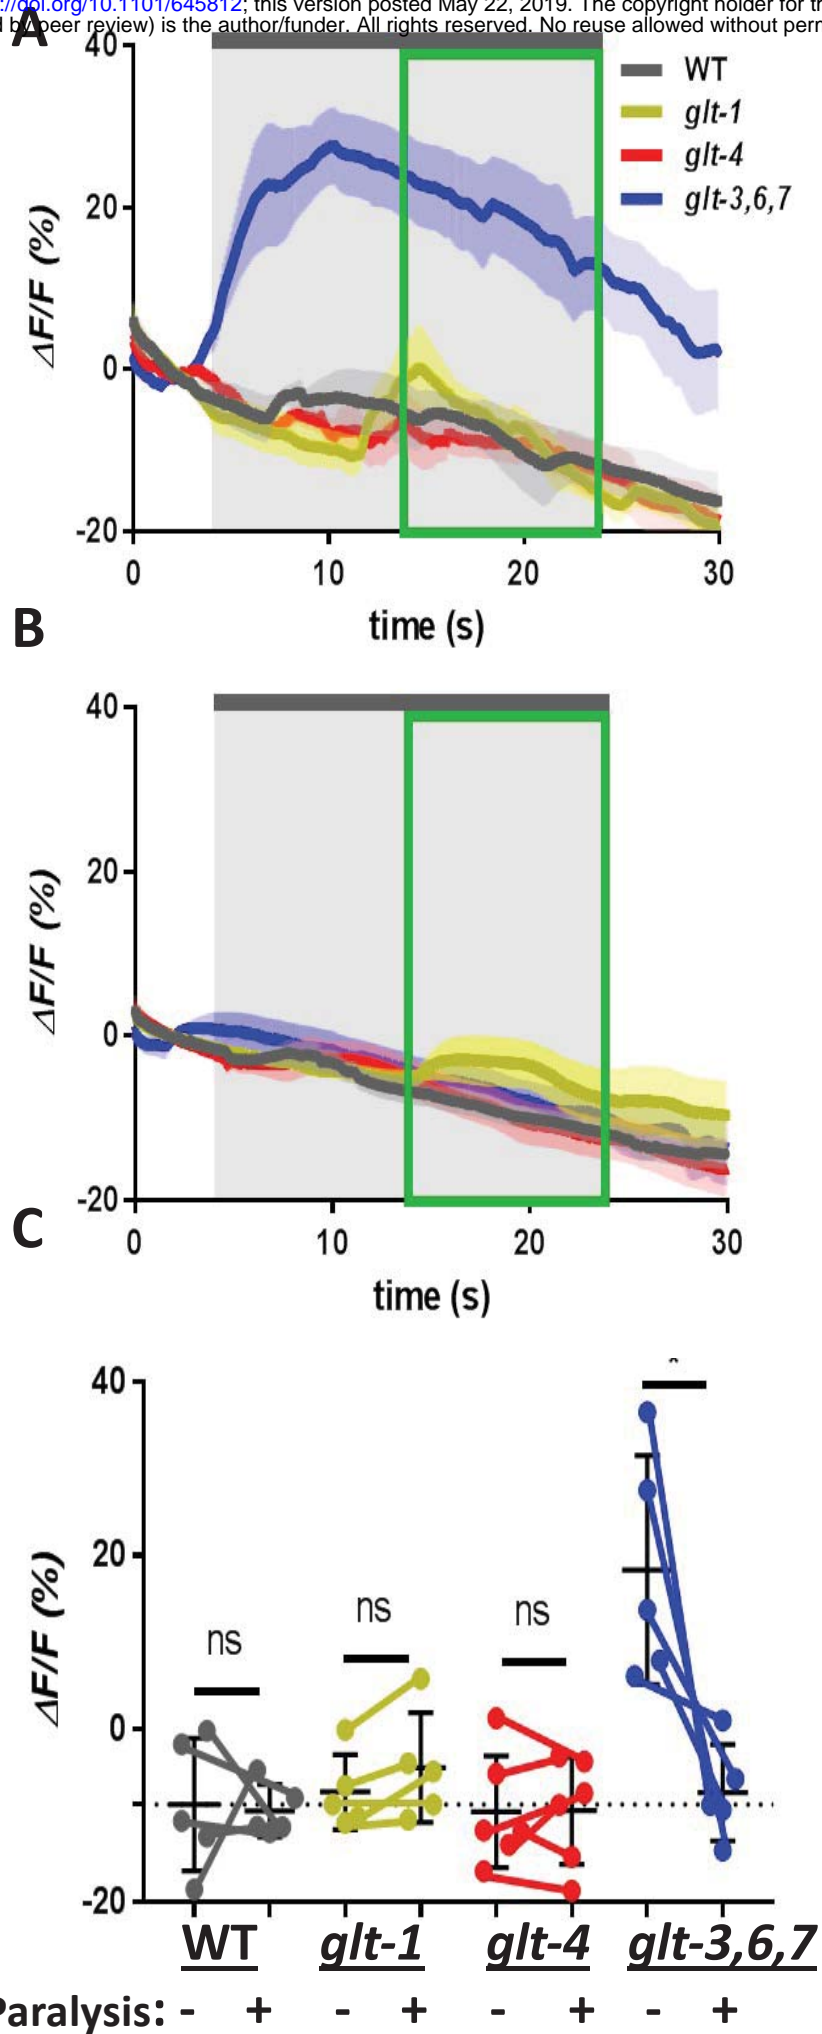

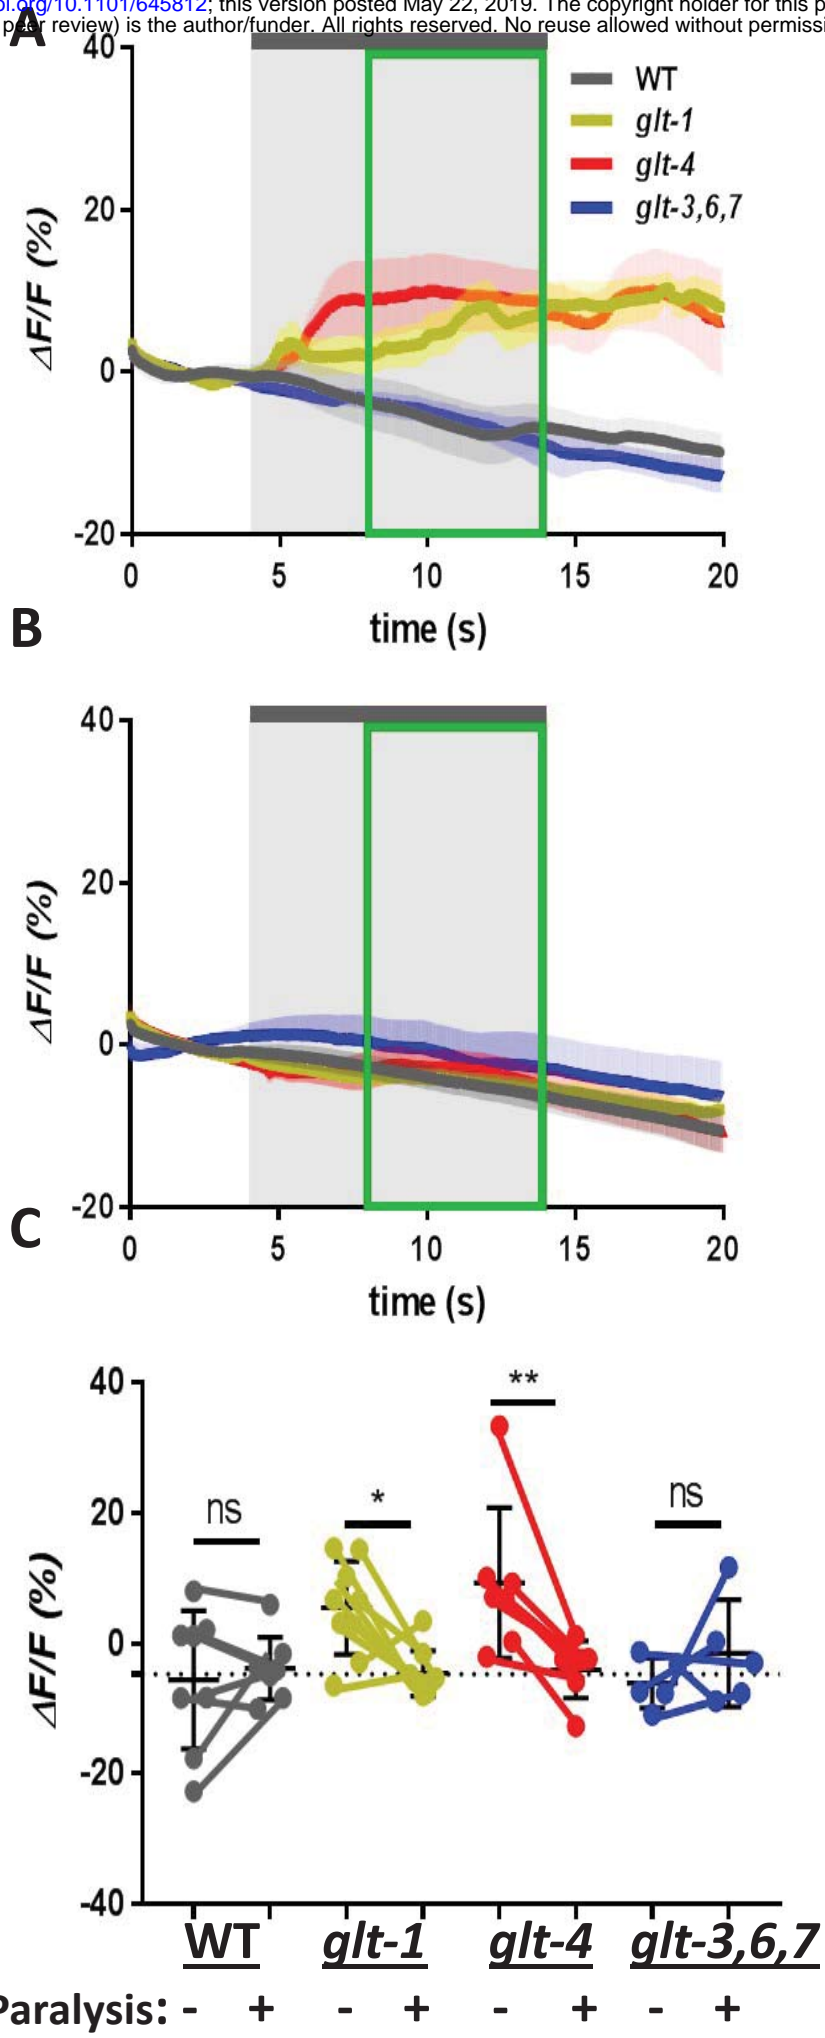

Source: http://biorxiv.org/content/10.1101/645812v1.full.pdf
